# Supplementary material
Source: PubMed Central journal article supplement (PMC3339047)
Supplement: NIHMS342419-supplement-Supp_Data.pdf [file NIHMS342419-supplement-Supp_Data.pdf]

<sup>1</sup>H NMR spectrum of compound 1

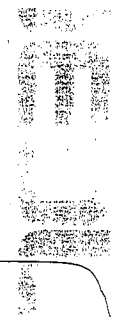

1

(Millions)

0 1.0 2.0 3.0 4.0 5.0 6.0 7.0 8.0 9.0 10.0 11.0 12.0 13.0 14.0 15.0 16.0 17.0 18.0 19.0 20.0 21.0 22.0

6.0660  
5.8362  
5.2454  
5.2271  
5.0403  
5.0238  
3.8982  
3.8818  
3.8644  
3.8479  
3.3780  
3.3606  
2.1957  
2.1151  
2.1004  
2.0867  
1.8046  
1.7698  
1.6645  
1.6260  
1.5857  
1.5500  
1.2789  
1.2615  
1.2432  
1.2249  
1.1764  
1.1599  
-0.0014  
-0.0097  
-0.0472  
-0.0555  
-0.1589

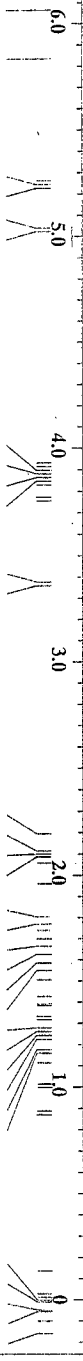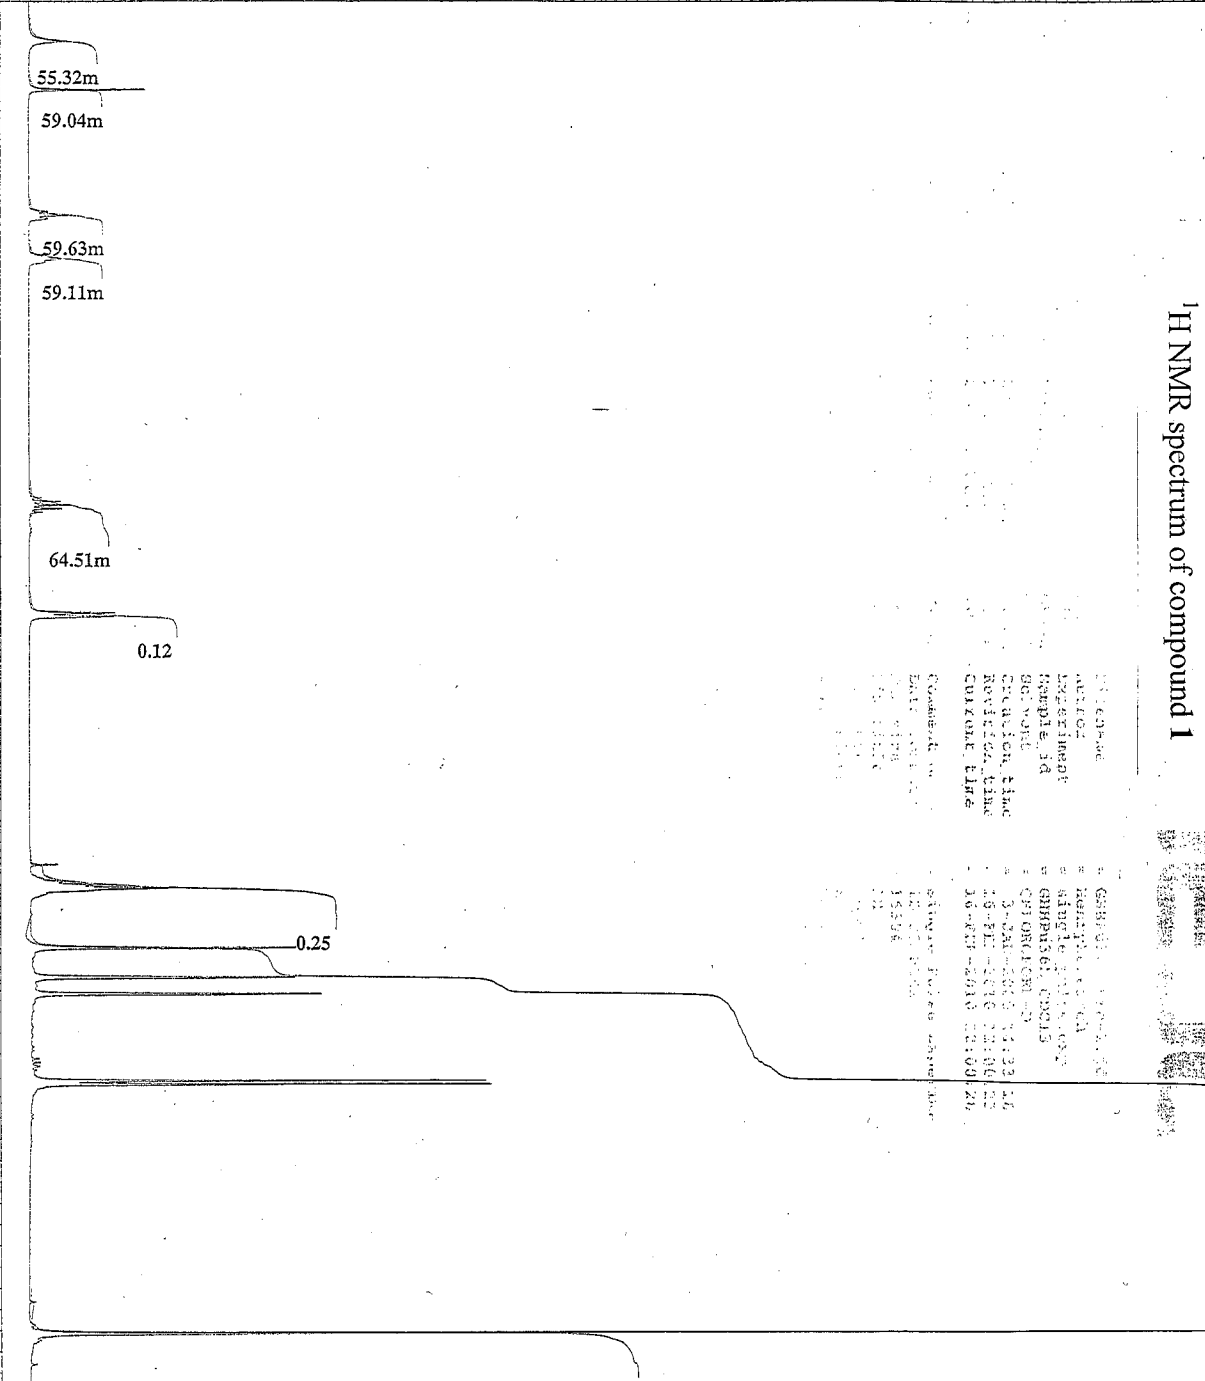

=====

File Name = GHNPR36b Pro-2.fdf  
 Author = HenryResearch  
 Experiment = single pulse-exp  
 Sample\_id = GHNPR36b\_CD13  
 Solvent = CHLOROFORM-D  
 Creation\_time = 3-JAN-2000 14:33:18  
 Revision\_time = 16-FEB-2010 12:00:23  
 Current\_time = 16-FEB-2010 12:00:28

=====

Comment = Single Pulse Experiment  
 Data\_format = ID\_COMPLEX  
 Dim\_size = 16384  
 Dim\_title = 1H  
 Dim\_units = [ppm]  
 Dimensions = X  
 Site = Eclipse+ 400  
 Spectrometer = DELTA\_NMR

=====

Field\_strength = 9.389766[T] (400 [MHz])  
 X\_acq\_duration = 2.7312128[ls]  
 X\_domain = 1H  
 X\_freq = 399.78219838[MHz]  
 X\_offset = 51[ppm]  
 X\_points = 16384  
 X\_prescans = 0  
 X\_resolution = 0.36613771[Hz]  
 X\_sweep = 5.99888024[KHz]  
 Clipped = FALSE  
 Mod\_return = 1  
 Scans = 14  
 Total\_scans = 14

=====

X\_90\_width = 11.2[us]  
 X\_acq\_time = 2.7312128[ls]  
 X\_angle = 45[deg]  
 X\_pulse = 5.6[us]  
 Initial\_wait = 1[us]  
 Phase\_preset = 3[us]  
 Recvr\_gain = 13  
 Relaxation\_delay = 4[ls]  
 Temp\_get = 22.8[dc]  
 Unblank\_time = 2[us]

X : parts per Million : 1H

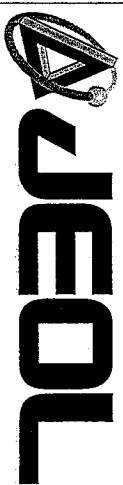

File Name = GHNPR36b Pro-2.fdf  
 Author = HenryResearch  
 Experiment = single pulse-exp  
 Sample\_id = GHNPR36b\_CD13  
 Solvent = CHLOROFORM-D  
 Creation\_time = 3-JAN-2000 14:33:18  
 Revision\_time = 16-FEB-2010 12:00:23  
 Current\_time = 16-FEB-2010 12:00:28

Comment = Single Pulse Experiment  
 Data\_format = ID\_COMPLEX  
 Dim\_size = 16384  
 Dim\_title = 1H  
 Dim\_units = [ppm]  
 Dimensions = X  
 Site = Eclipse+ 400  
 Spectrometer = DELTA\_NMR

Field\_strength = 9.389766[T] (400 [MHz])  
 X\_acq\_duration = 2.7312128[ls]  
 X\_domain = 1H  
 X\_freq = 399.78219838[MHz]  
 X\_offset = 51[ppm]  
 X\_points = 16384  
 X\_prescans = 0  
 X\_resolution = 0.36613771[Hz]  
 X\_sweep = 5.99888024[KHz]  
 Clipped = FALSE  
 Mod\_return = 1  
 Scans = 14  
 Total\_scans = 14

X\_90\_width = 11.2[us]  
 X\_acq\_time = 2.7312128[ls]  
 X\_angle = 45[deg]  
 X\_pulse = 5.6[us]  
 Initial\_wait = 1[us]  
 Phase\_preset = 3[us]  
 Recvr\_gain = 13  
 Relaxation\_delay = 4[ls]  
 Temp\_get = 22.8[dc]  
 Unblank\_time = 2[us]

<sup>13</sup>C NMR spectrum of compound 1

20100101

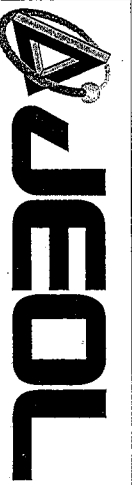

=====  
 Experiment  
 Experiment: GHRN36B  
 Sample\_ID: GHRN36B  
 Solvent: CHLOROFORM-D  
 Creation\_time: 3-JAN-2000 15:03:45  
 Revision\_time: 16-FEB-2010 12:30:29  
 Current\_time: 16-FEB-2010 12:30:36

=====  
 Parameters  
 Data\_Format: ID\_COMPLEX  
 Dim\_size: 16384  
 Dim\_title: 13C  
 Dim\_units: [ppm]  
 Dimensions: X  
 Site: Rclpse+ 400  
 Spectrometer: DELTA\_NMR

=====  
 Acquisition  
 Field\_strength: 9.389766[GT] (400 [MHz])  
 X\_acq\_duration: 0.6504448 [s]  
 X\_domain: 13C  
 X\_freq: 100.52530333 [MHz]  
 X\_offset: 100 [ppm]  
 X\_points: 16384  
 X\_resolution: 4  
 X\_resolution: 1.53740948 [Hz]  
 X\_sweep: 25.18891688 [kHz]  
 Irr\_domain: 1H  
 Irr\_freq: 399.78219838 [MHz]  
 Irr\_offset: 5 [ppm]  
 Clipped: FALSE  
 Mod\_return: 1  
 Scans: 1079  
 Total\_scans: 1079

=====  
 Processing  
 X\_90\_width: 11.6 [us]  
 X\_acq\_time: 0.6504448 [s]  
 X\_angle: 30 [deg]  
 X\_pulse: 3.86666667 [us]  
 Initial\_wait: 1 [s]  
 Phase\_preset: 3 [us]  
 Recvr\_gain: 29  
 Relaxation\_delay: 1 [s]  
 Temp\_get: 24.7 [dC]  
 Unblank\_time: 2 [us]

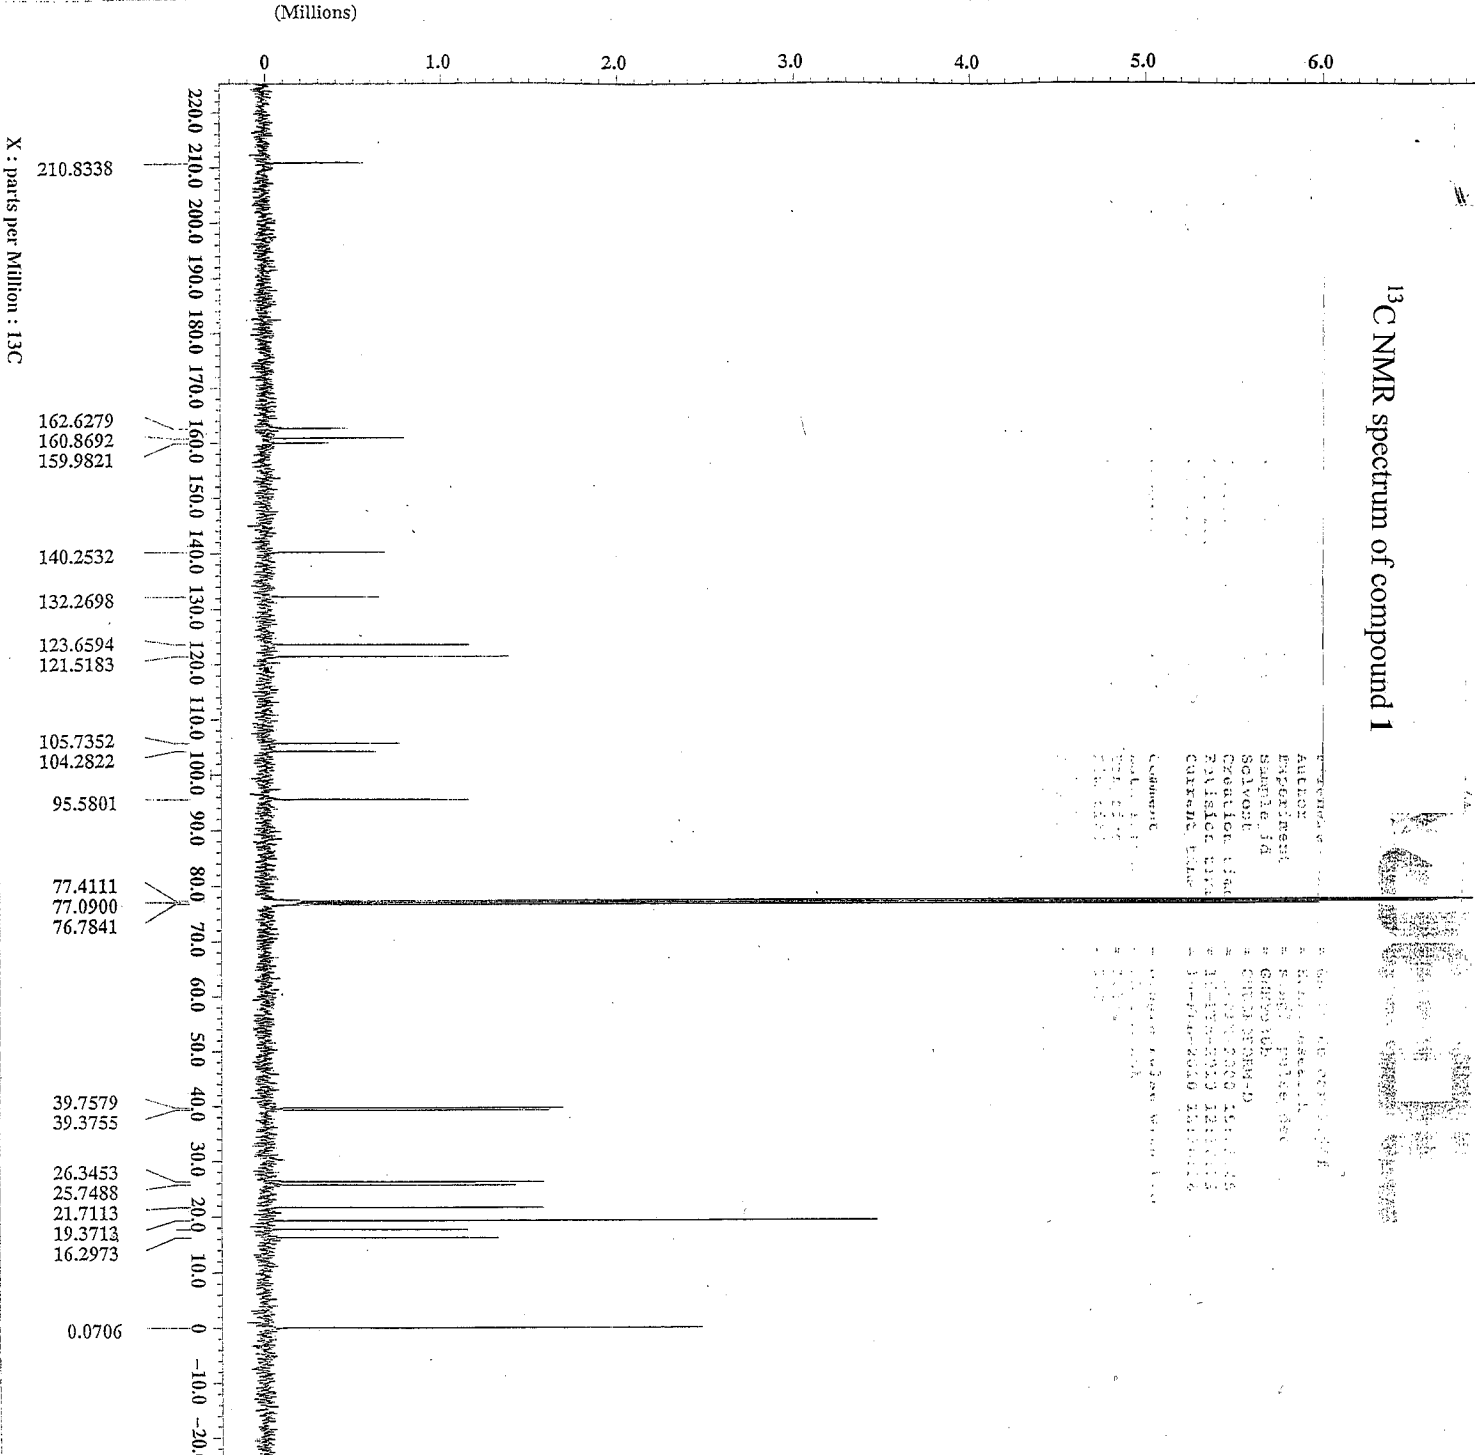

<sup>1</sup>H NMR spectrum of compound 2

100%

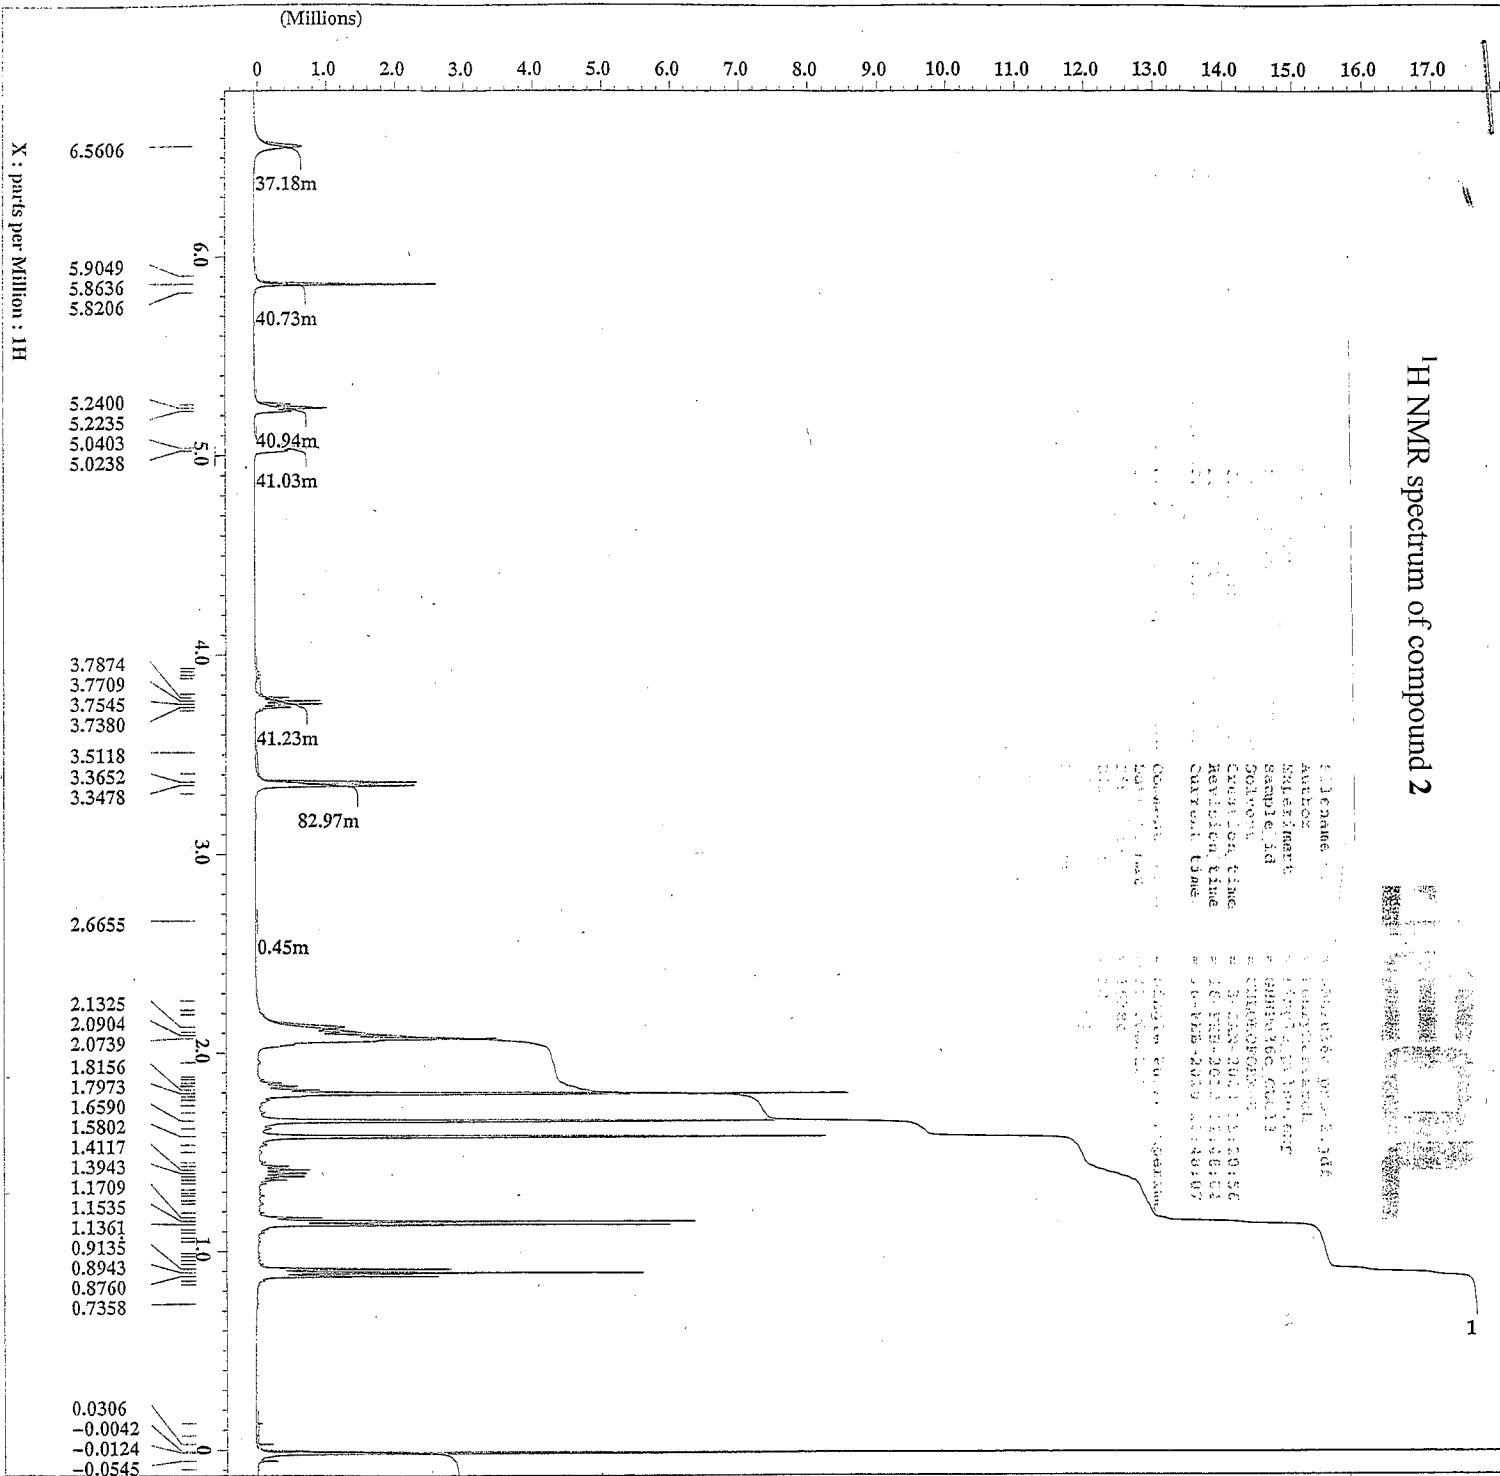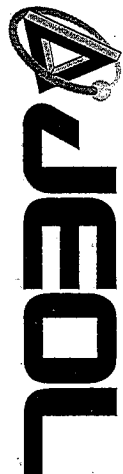

```

Filename = GHHpu36c.pro-2.fid
Author = HenryResearch
Experiment = single_pulse.exp
Sample_id = GHHpu36c_CDCl3
Solvent = CHLOROFORM-D
Creation_time = 3-JAN-2000 15:20:56
Revision_time = 16-FEB-2010 12:48:04
Current_time = 16-FEB-2010 12:48:07

Comment
Data_format = Single pulse Experiment
Dim_size = 1D COMPLEX
Dim_title = 16384
Dim_units = 1H
Dimensions = [ppm]
Site = X
Spectrometer = Eclipse+ 400
          = DELTA_NMR

Field_strength = 9.389766[M] (400[MHz])
X_acq_duration = 2.7312128[s]
X_domain = 1H
X_freq = 399.78219838[MHz]
X_offset = 5[ppm]
X_points = 16384
X_prescans = 0
X_resolution = 0.36613771[MHz]
X_sweep = 5.99880024[kHz]
Clipped = FALSE
Mod_return = 1
Scans = 11
Total_scans = 11

X_90_width = 11.2[us]
X_acq_time = 2.7312128[s]
X_angle = 45[deg]
X_pulse = 5.6[us]
Initial_wait = 1[us]
Phase_preset = 3[us]
Recvr_gain = 12
Relaxation_delay = 4[us]
Temp_get = 23[degC]
Unblank_time = 2[us]
    
```

<sup>13</sup>C NMR spectrum of compound 2

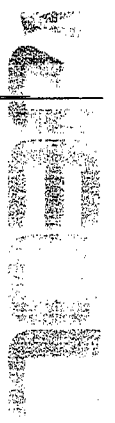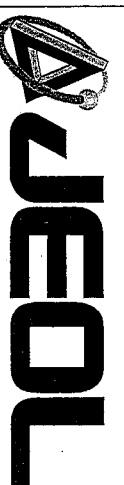

```

=====
* Name:          GHNH36c-car-3-jdf
* Author:        Hennrichresearch
* Experiment:    single_pulse_dec
* Sample_id:    GHNH36c
* Solvent:       CHLOROFORM-D
* Creation_time: 3-JAN-2000 16:44:17
* Revision_time: 16-FEB-2010 16:25:20
* Current_time:  16-FEB-2010 16:25:41
=====

```

```

=====
* Comment:      Single Pulse with Bro
* Data_format: ID_COMPLEX
* Dim_size:     16384
* Dim_title:    13C
* Dim_units:    [ppm]
* Dimensions:   = X
* Site:         = ECLIPSE+ 400
* Spectrometer: DELTA_NMR
=====

```

```

=====
* Field_strength = 9.389766 [T] (400 [MHz])
* X_acq_duration = 0.6504448 [s]
* X_domain:      = 13C
* X_freq:        = 100.52530333 [MHz]
* X_offset:      = 100 [ppm]
* X_points:      = 16384
* X_prescans:    = 4
* X_resolution: = 1.53740948 [Hz]
* X_sweep:       = 25.18891688 [kHz]
* Irr_domain:    = 1H
* Irr_freq:      = 399.78219838 [MHz]
* Irr_offset:    = 5 [ppm]
* Clipped:       = FALSE
* Mod_return:    = 1
* Scans:         = 3000
* Focal_scans:   = 3000
* X_90_width:    = 11.6 [us]
* X_acq_time:    = 0.6504448 [s]
* X_angle:       = 30 [deg]
* X_pulse:       = 3.86666667 [us]
* Initial_wait:  = 1 [s]
* Phase_preset:  = 3 [us]
* Recv_gain:     = 29
* Relaxation_delay = 1 [s]
* Temp_get:      = 24.8 [dC]
* Unblank_time: = 2 [us]
=====

```

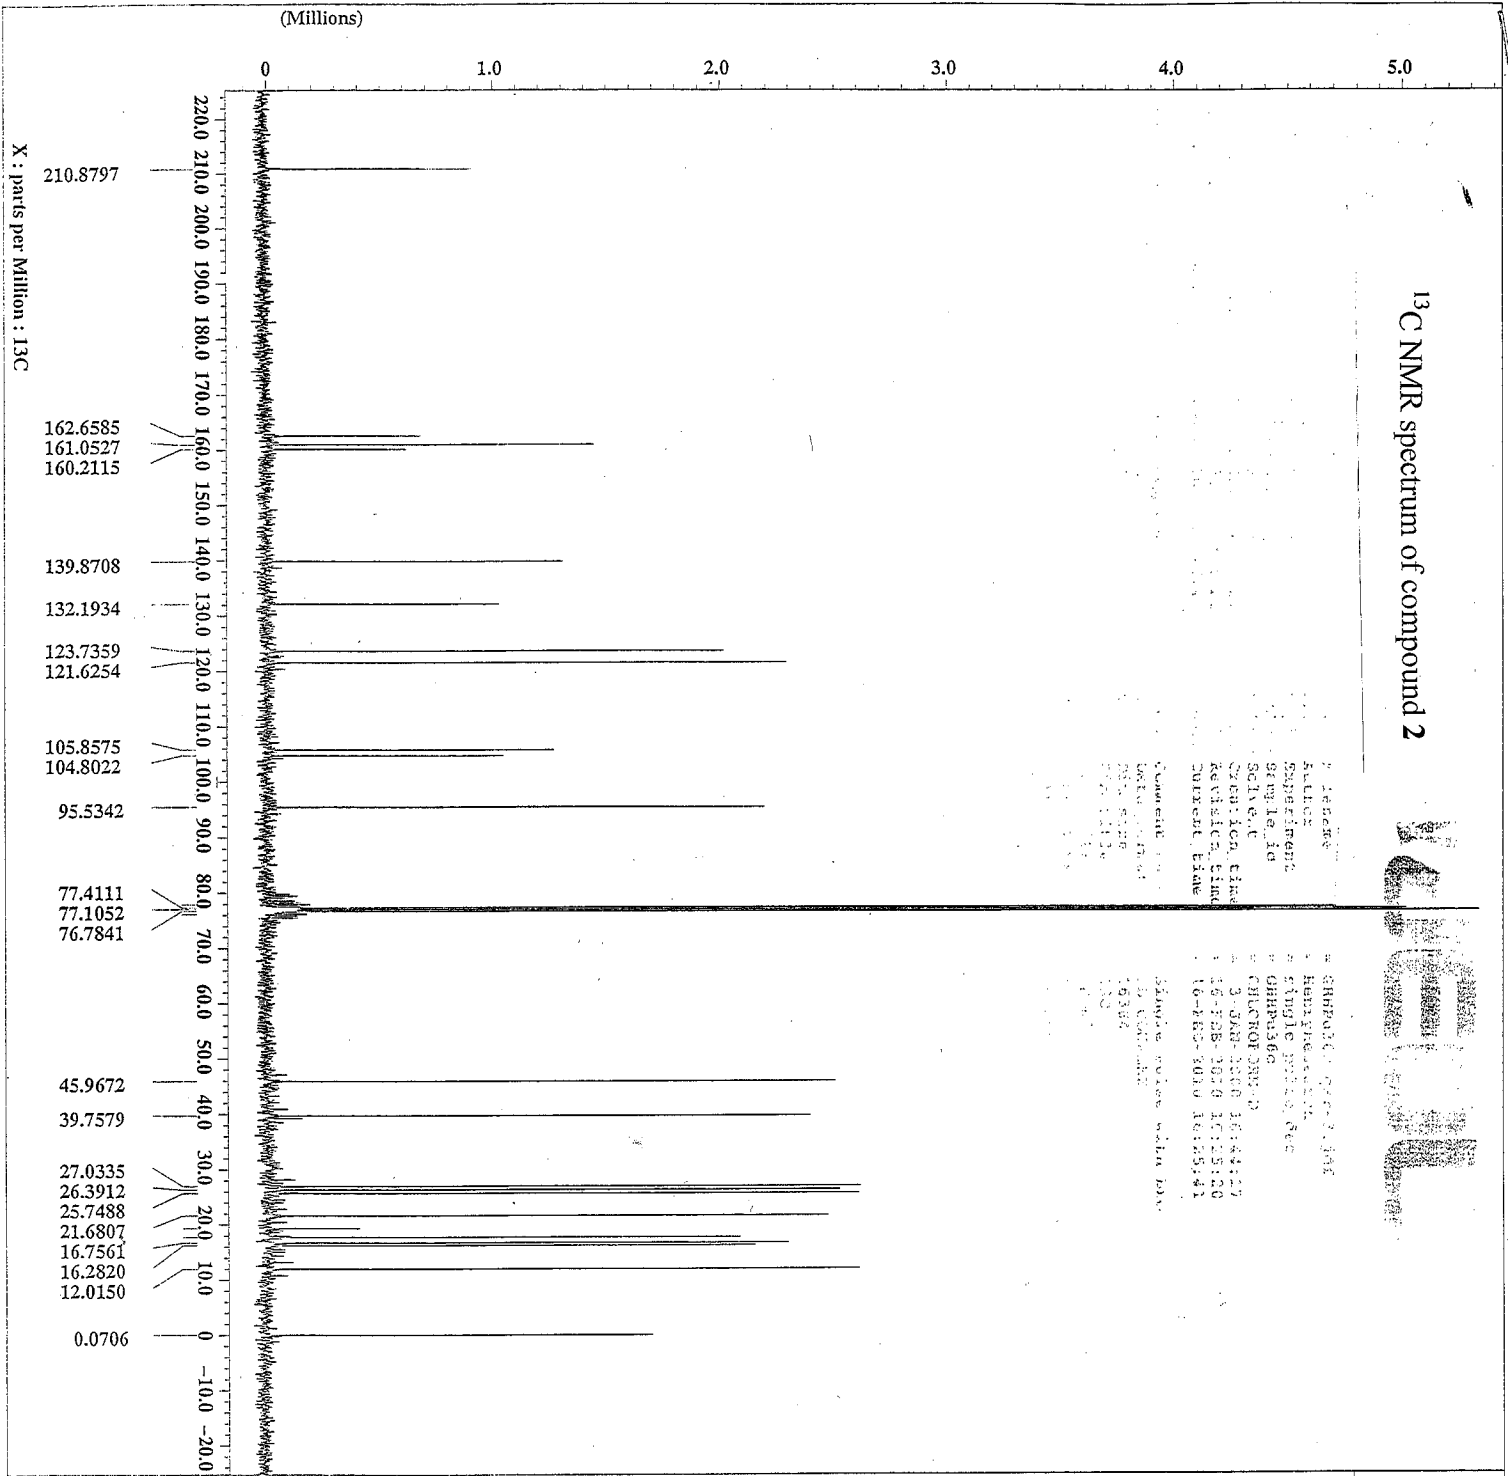

X : parts per Million : 13C

<sup>1</sup>H NMR spectrum of compound 3

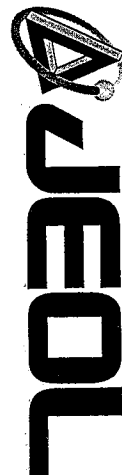

```

Filename      = GHHDen54A-Pro-2-.jdf
Author        = HenryResearch
Experiment    = single_pulse.exp
Sample Id     = GHHDen54A_CDCl3
Solvent       = CHLOROFORM-D
Creation time = 21-JUL-2008 04:20:58
Revision time = 12-AUG-2008 10:04:31
Current time  = 12-AUG-2008 10:04:48
    
```

```

Comment
Data format   = 1D COMPLEX
Dim_size      = 16384
Dim_title     = 1H
Dim_units     = [ppm]
Dimensions    = X
Site          = Eclipsec+ 400
Spectrometer  = DELTA_NMR
    
```

```

Field strength = 9.389766[F] (400[Mhz])
X_acq_duration = 2.7312128[s]
X_domain       = 1H
X_freq         = 399.78219838[Mhz]
X_offset       = 5[ppm]
X_points       = 16384
X_prescans     = 0
X_resolution   = 0.36613771[Hz]
X_sweep        = 5.99880024[KHz]
Clipped        = FALSE
Mod_return     = 1
Scans          = 43
Total_scans    = 43
    
```

```

X_90_width     = 10.9[us]
X_acq_time     = 2.7312128[s]
X_angle        = 45[deg]
X_pulse        = 5.45[us]
Initial wait   = 1[us]
Phase preset   = 3[us]
Recvr_gain     = 15
Relaxation_delay = 4[us]
Temp_get       = 18.6[DCI]
Unblank_time   = 2[us]
    
```

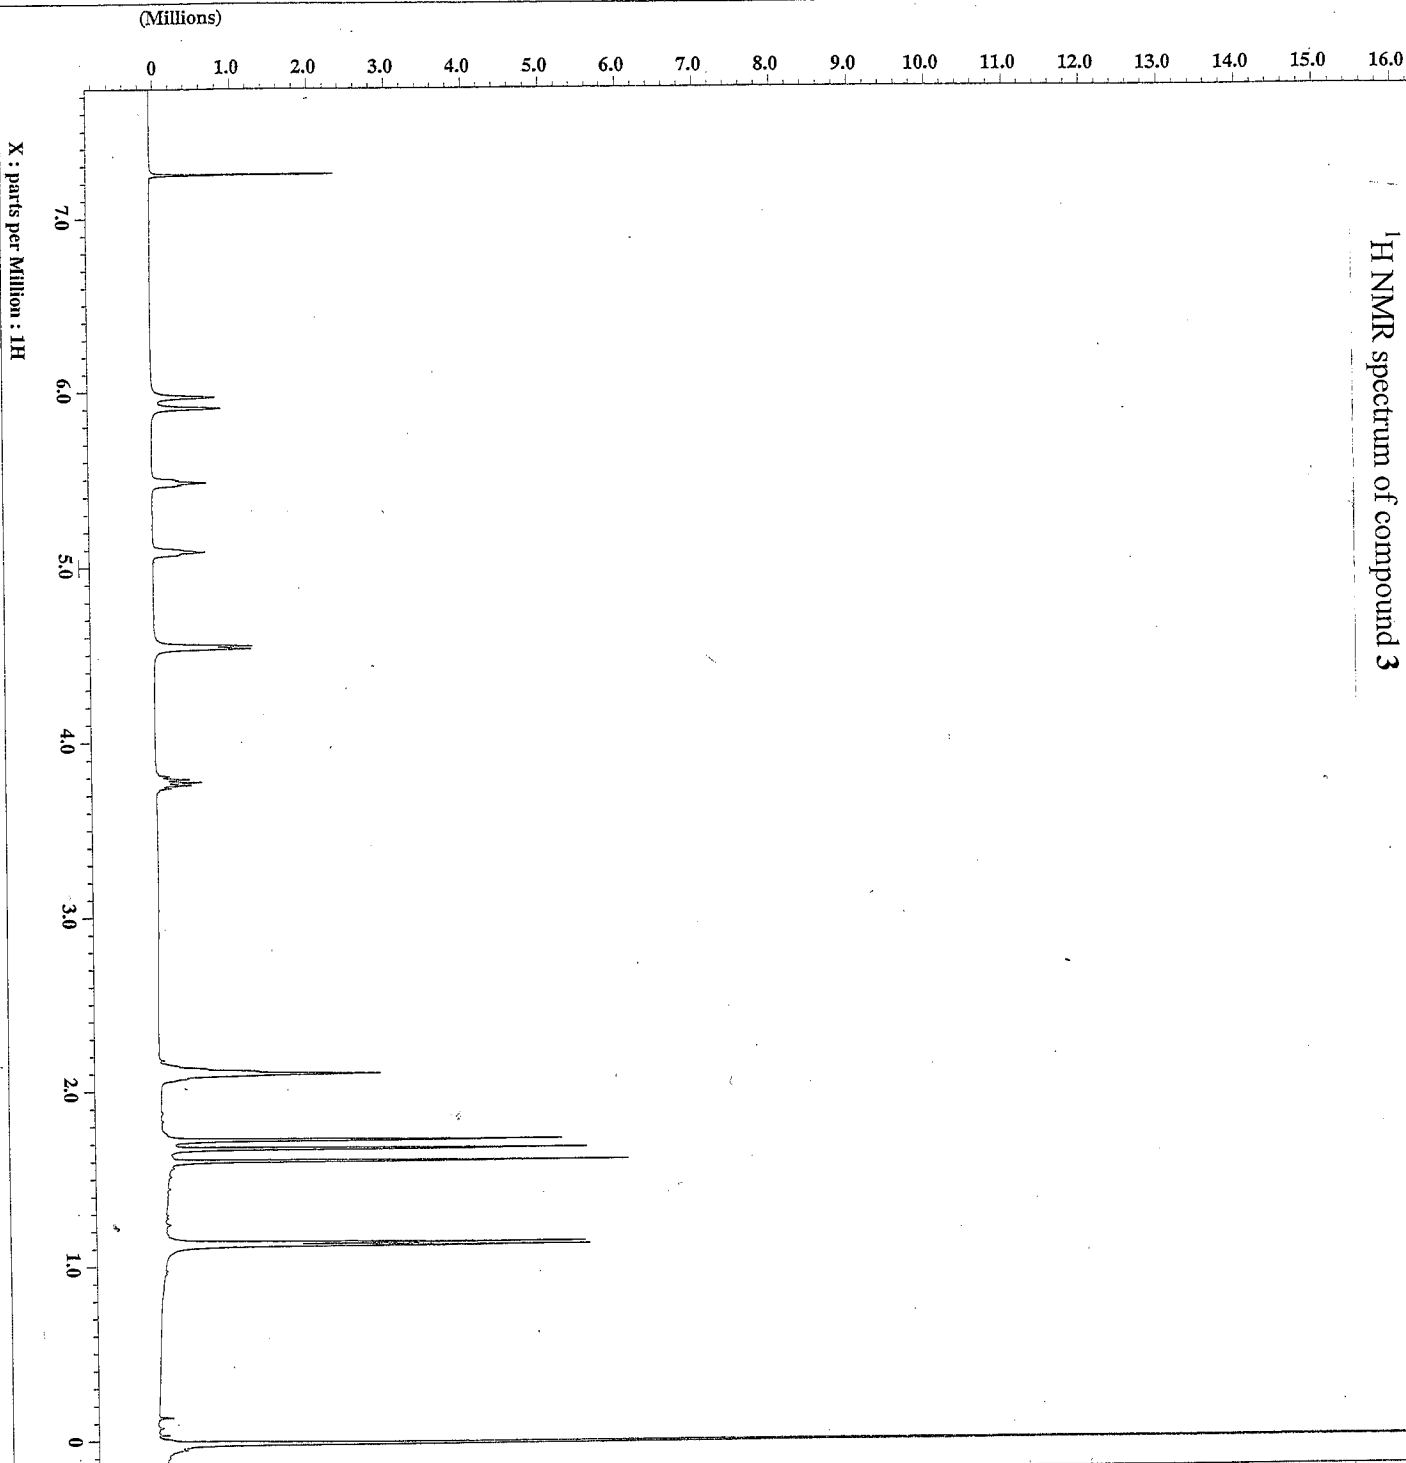

<sup>13</sup>C NMR spectrum of compound 3

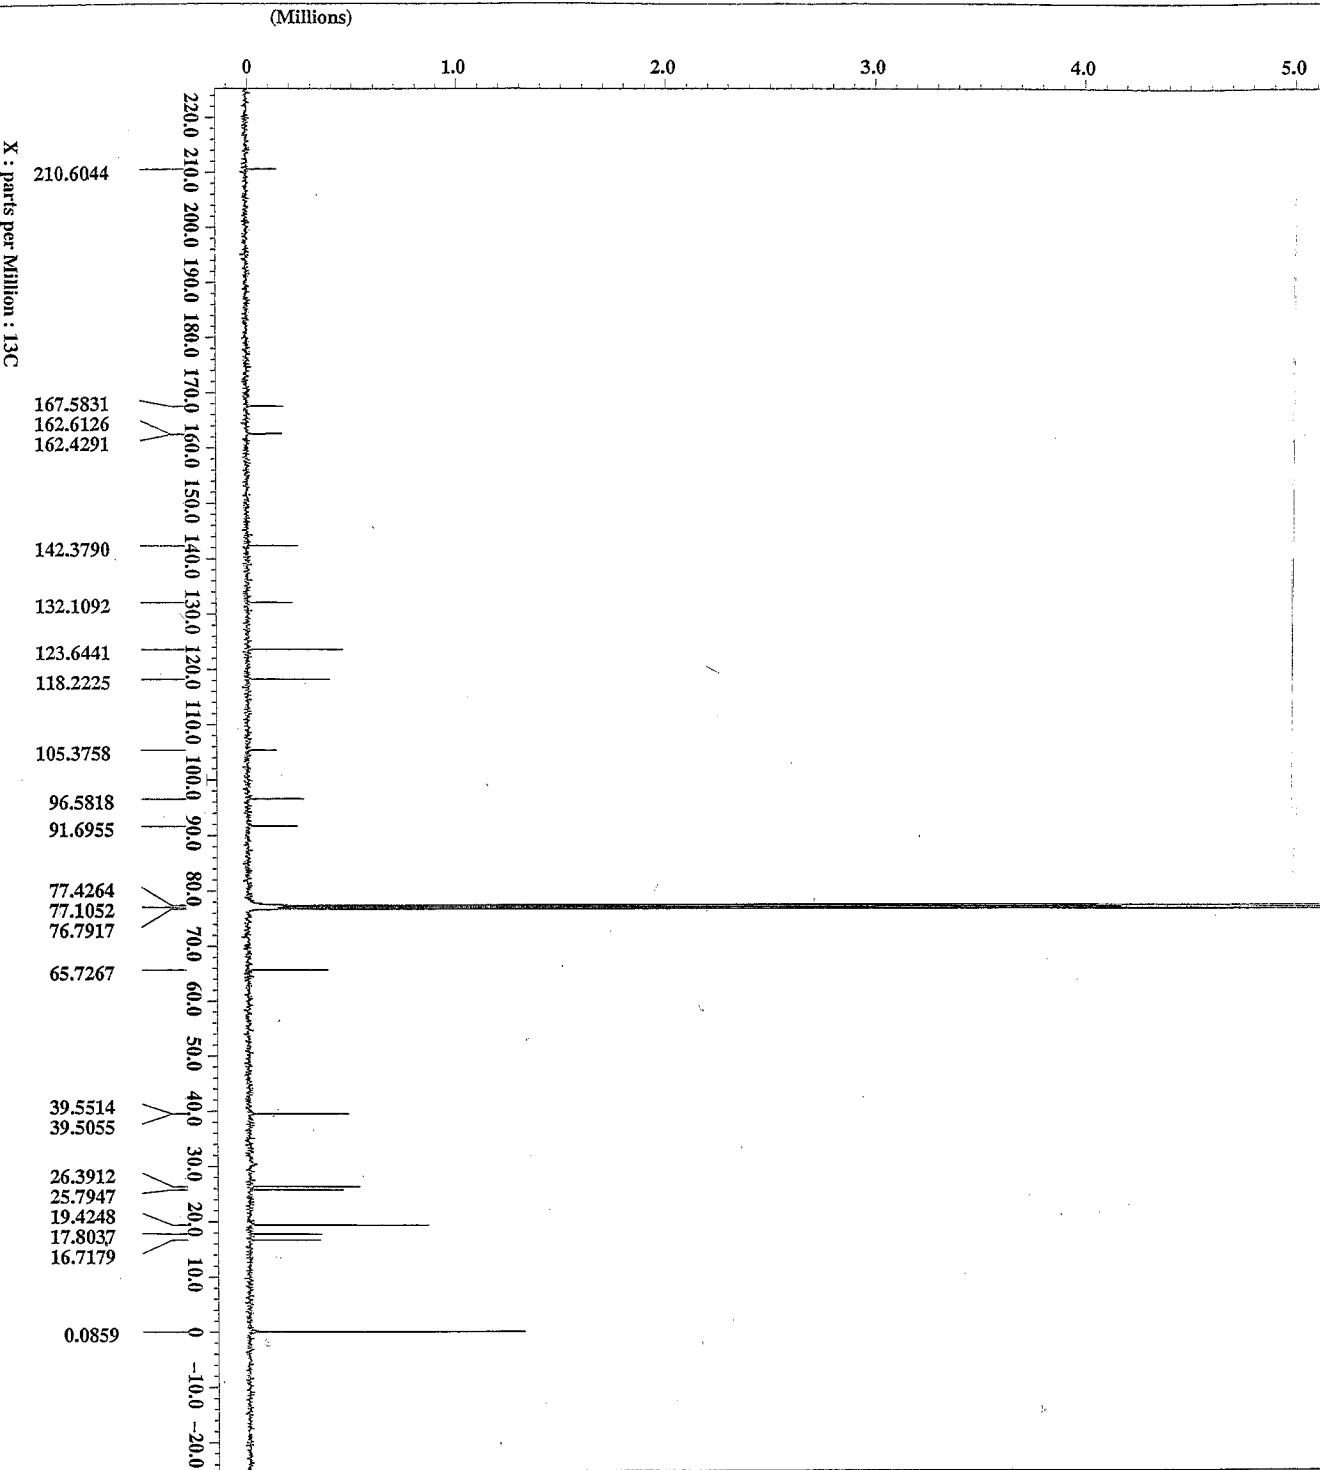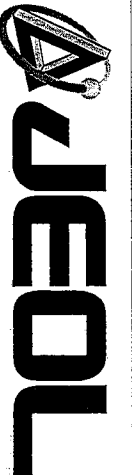

```

Filename = GHHDens54a_car-2.jdf
Author = HenryResearch
Experiment = single_pulse_dec
Sample_id = GHHDens54a
Solvent = CHLOROFORM-D
Creation_time = 21-JUL-2008 07:18:41
Revision_time = 12-AUG-2008 13:02:22
Current_time = 12-AUG-2008 13:03:14

Comment = Single pulse with Bro
Data_format = 1D COMPLEX
Dim_size = 32768
Dim_title = 13C
Dim_units = [ppm]
Dimensions = X
Site = EClipset+ 400
Spectrometer = DELTA_NMR

Field_strength = 9.389766[TV] (400 [MHz])
X_acq_duration = 1.3008896[ls]
X_domain = 13C
X_freq = 100.52530333 [MHz]
X_offset = 100 [ppm]
X_points = 32768
X_prescans = 4
X_resolution = 0.76870474 [Hz]
X_sweep = 25.18891688 [kHz]
Irr_domain = 1H
Irr_freq = 399.78219838 [MHz]
Irr_offset = 5 [ppm]
Clipped = TRUE
Mod_return = 1
Scans = 4560
Total_scans = 4560

X_90_width = 11.1[us]
X_acq_time = 1.3008896[ls]
X_angle = 30[deg]
X_pulse = 3.7[us]
Initial_wait = 1[ls]
Phase_preset = 3[us]
Recvr_gain = 29
Relaxation_delay = 1[ls]
Temp_get = 20.7[degC]
Unblank_time = 2[us]
    
```

<sup>1</sup>H NMR spectrum of compound 4

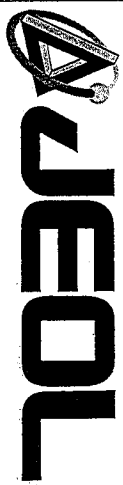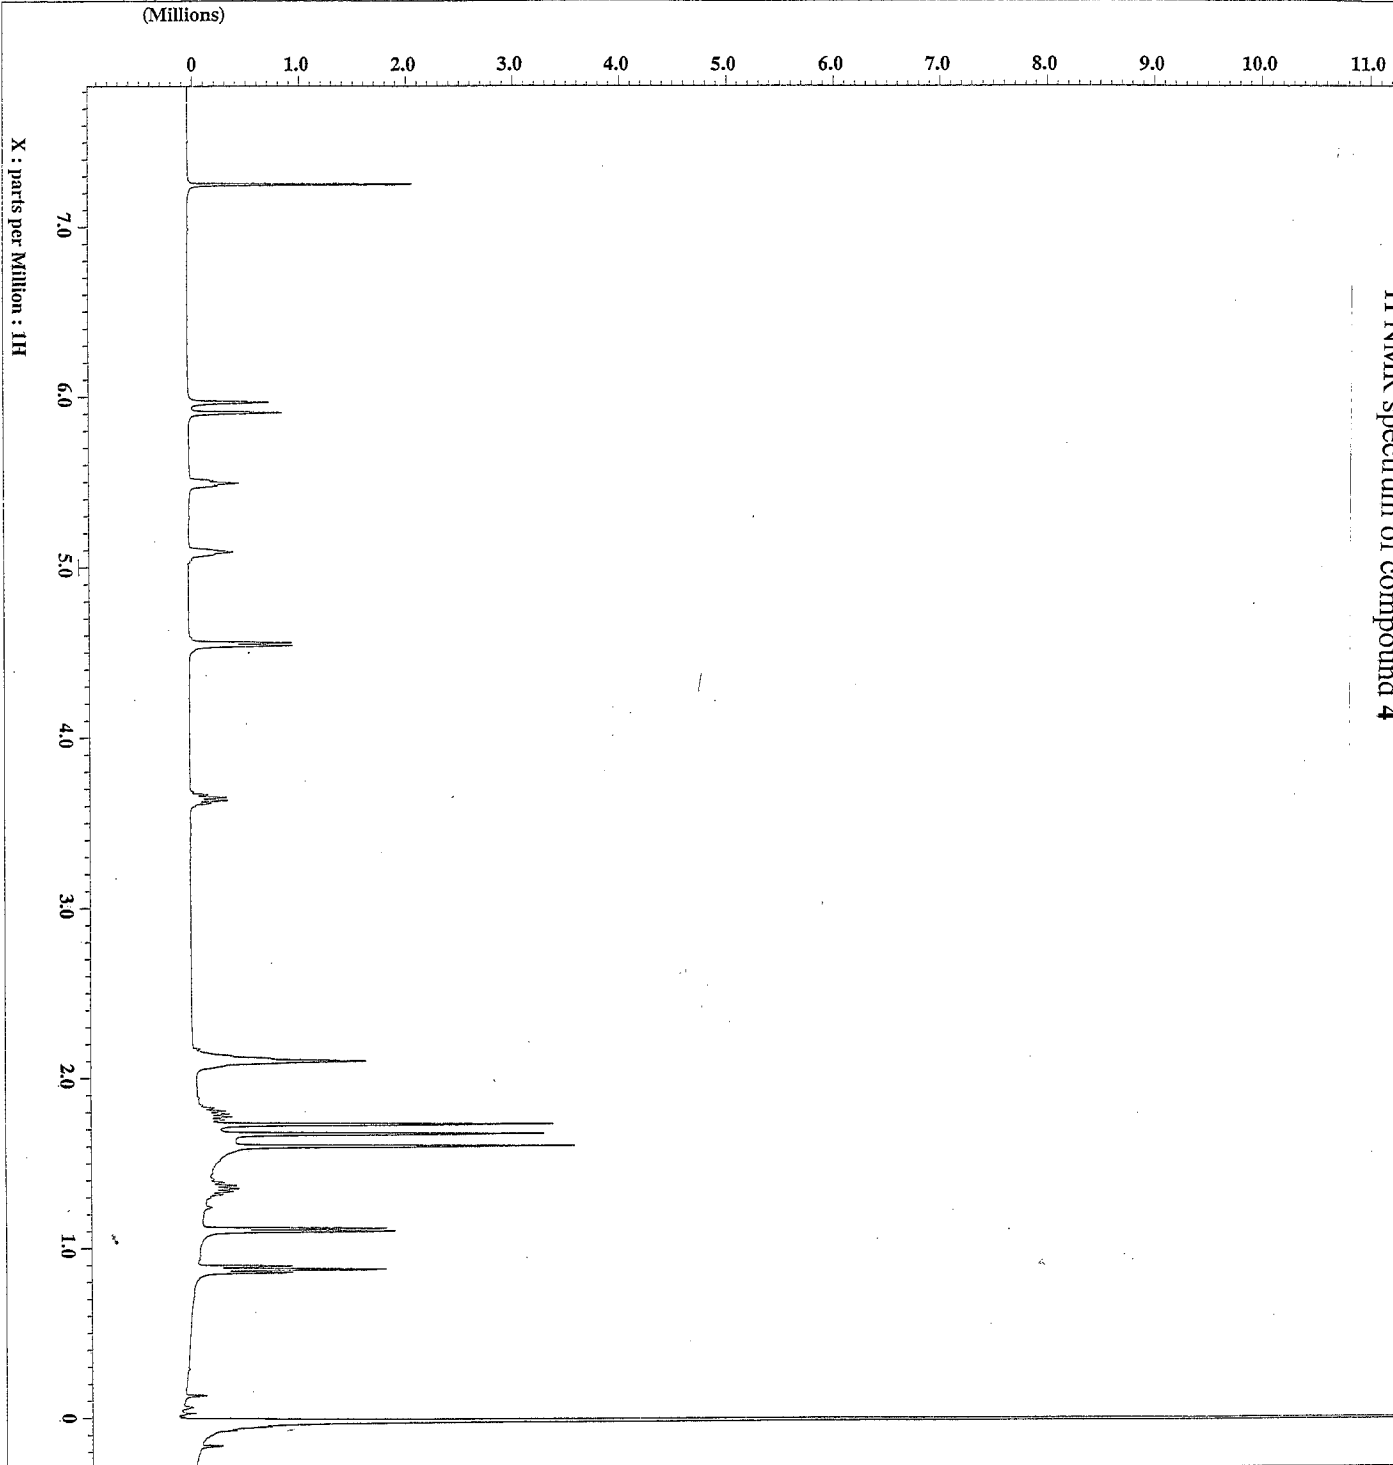

```

Filename = GHHDens54b-2.fdf
Author = HenryResearch
Experiment = single_pulse.exp
Sample_id = SH474047
Solvent = CHLOROFORM-D
Creation_time = 21-JUL-2008 07:31:17
Revision_time = 12-AUG-2008 13:14:50
Current_time = 12-AUG-2008 13:15:03

Comment = Single pulse Experiment
Data_format = 1D_COMPLEX
Dim_size = 16384
Dim_title = 1H
Dim_units = (ppm)
Dimensions = X
Site = Eclipset+ 400
Spectrometer = DELTA_NMR

Field_strength = 9.389766 [T] (400 [MHz])
X_acq_duration = 2.7312128 [s]
X_domain = 1H
X_freq = 399.78219838 [MHz]
X_offset = 51 [ppm]
X_points = 16384
X_prescans = 0
X_resolution = 0.36613771 [Hz]
X_sweep = 5.9988024 [kHz]
Clipped = FALSE
Mod_return = 1
Scans = 39
Total_scans = 39

X_90_width = 10.9 [us]
X_acq_time = 2.7312128 [s]
X_angle = 45 [deg]
X_pulse = 5.45 [us]
Initial_wait = 1 [s]
Phase_preset = 3 [us]
Recvr_gain = 16
Relaxation_delay = 4 [s]
Temp_get = 19.3 [dC]
Unblank_time = 2 [us]
    
```

<sup>13</sup>C NMR spectrum of compound 4

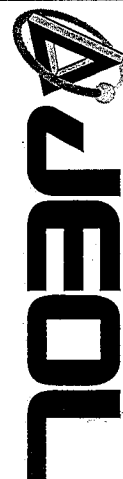

Filename = GHHDens54b\_car-2.fdf  
 Author = HennryResearch  
 Experiment = single\_pulse\_dec  
 Sample\_id = GHHDens54b  
 Solvent = CHLOROFORM-D  
 Creation\_time = 21-JUL-2008 12:43:06  
 Revision\_time = 12-AUG-2008 18:26:43  
 Current\_time = 12-AUG-2008 18:27:13

Comment = Single Pulse with Bro  
 Data\_format = ID\_COMPLEX  
 Dim\_size = 32768  
 Dim\_title = 13C  
 Dim\_units = [ppm]  
 Dimensions = X  
 Site = ECLIPSE+ 400  
 Spectrometer = DELTA\_NMR

Field\_strength = 9.389766 [r] (400 [MHz])  
 X\_acq\_duration = 1.3008896 [s]  
 X\_domain = 13C  
 X\_freq = 100.52530333 [MHz]  
 X\_offset = 100 [ppm]  
 X\_points = 32768  
 X\_prescans = 4  
 X\_resolution = 0.76870474 [Hz]  
 X\_sweep = 25.18891688 [kHz]  
 Irr\_domain = 1H  
 Irr\_freq = 399.78219838 [MHz]  
 Irr\_offset = 5 [ppm]  
 Clipped = TRUE  
 Mod\_return = 1  
 Scans = 8108  
 Total\_scans = 8108  
 X\_90\_width = 11.1 [us]  
 X\_acq\_time = 1.3008896 [s]  
 X\_angle = 30 [deg]  
 X\_pulse = 3.7 [us]  
 Initial\_wait = 1 [s]  
 Phase\_preset = 3 [us]  
 Recvr\_gain = 29  
 Relaxation\_delay = 1 [s]  
 Temp\_get = 21.1 [dC]  
 Onblank\_time = 2 [us]

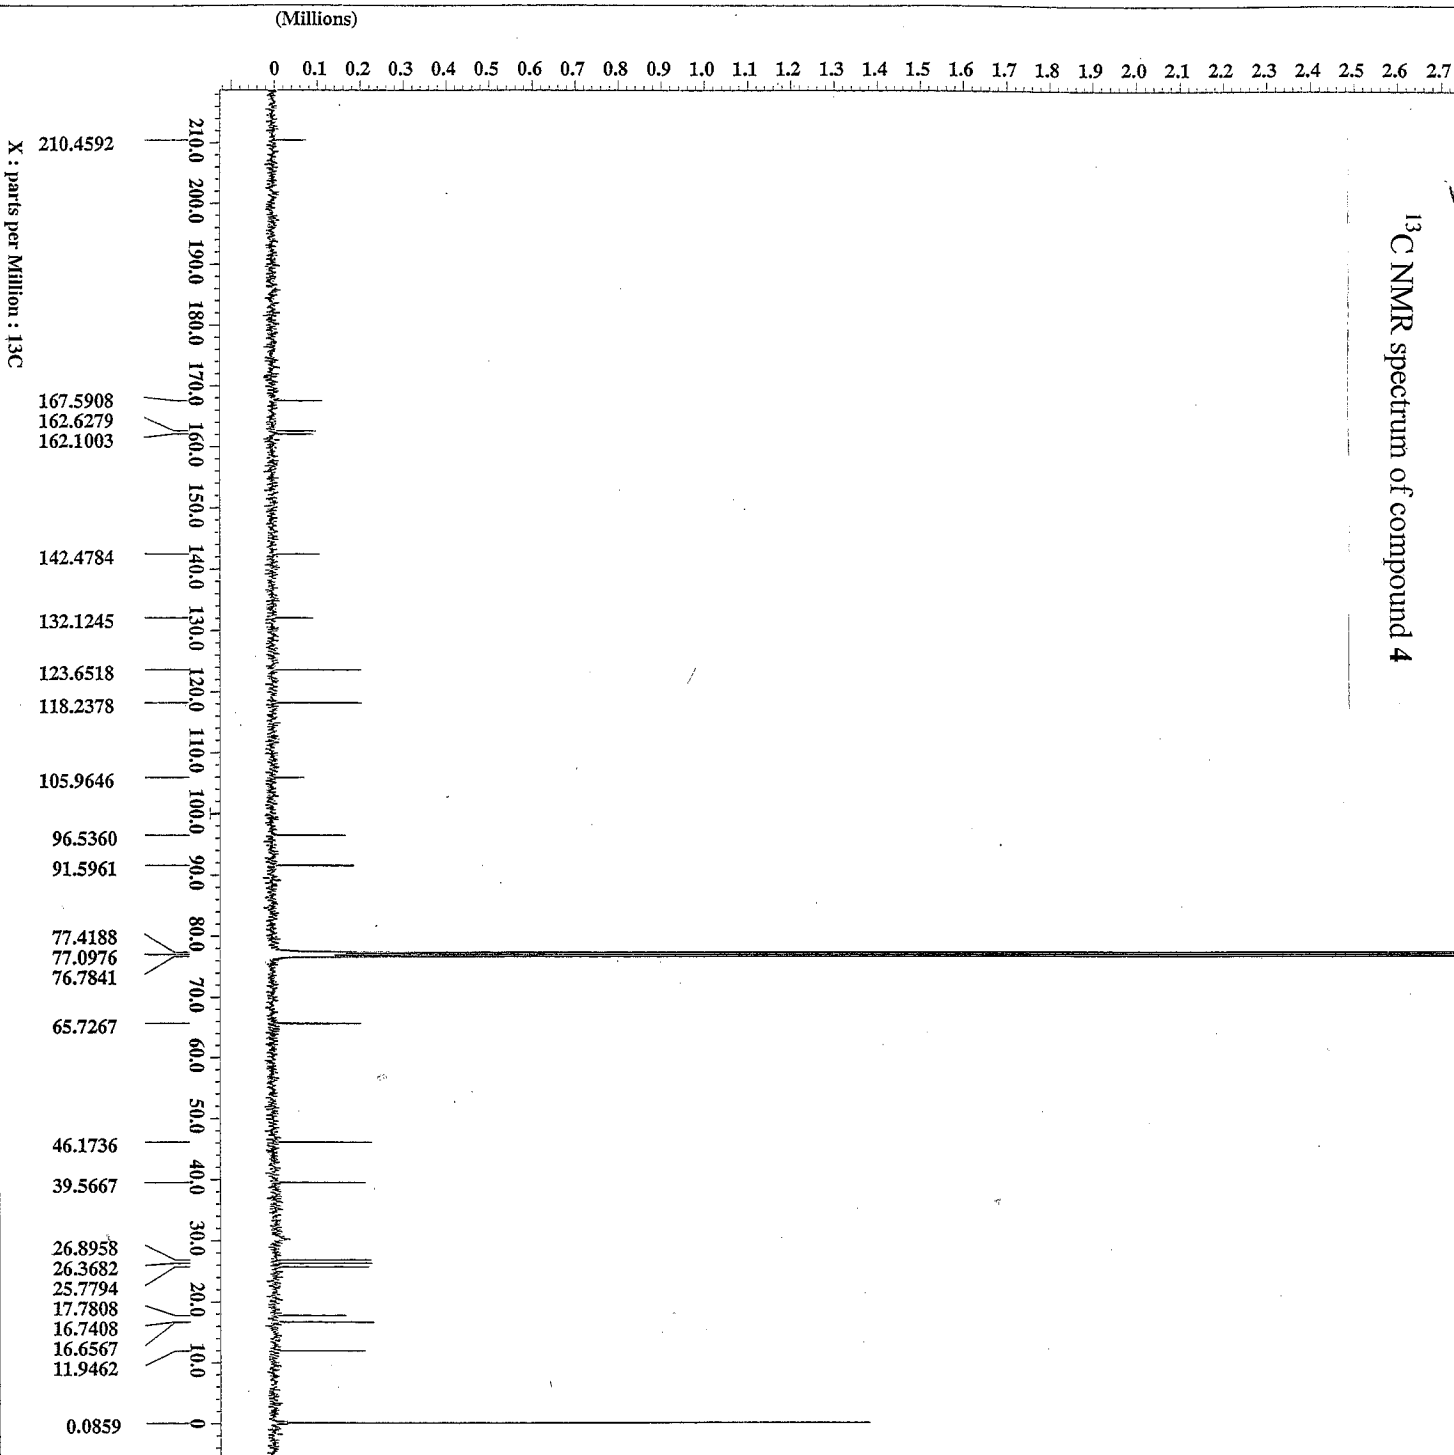



<sup>1</sup>H NMR spectrum of compound 5

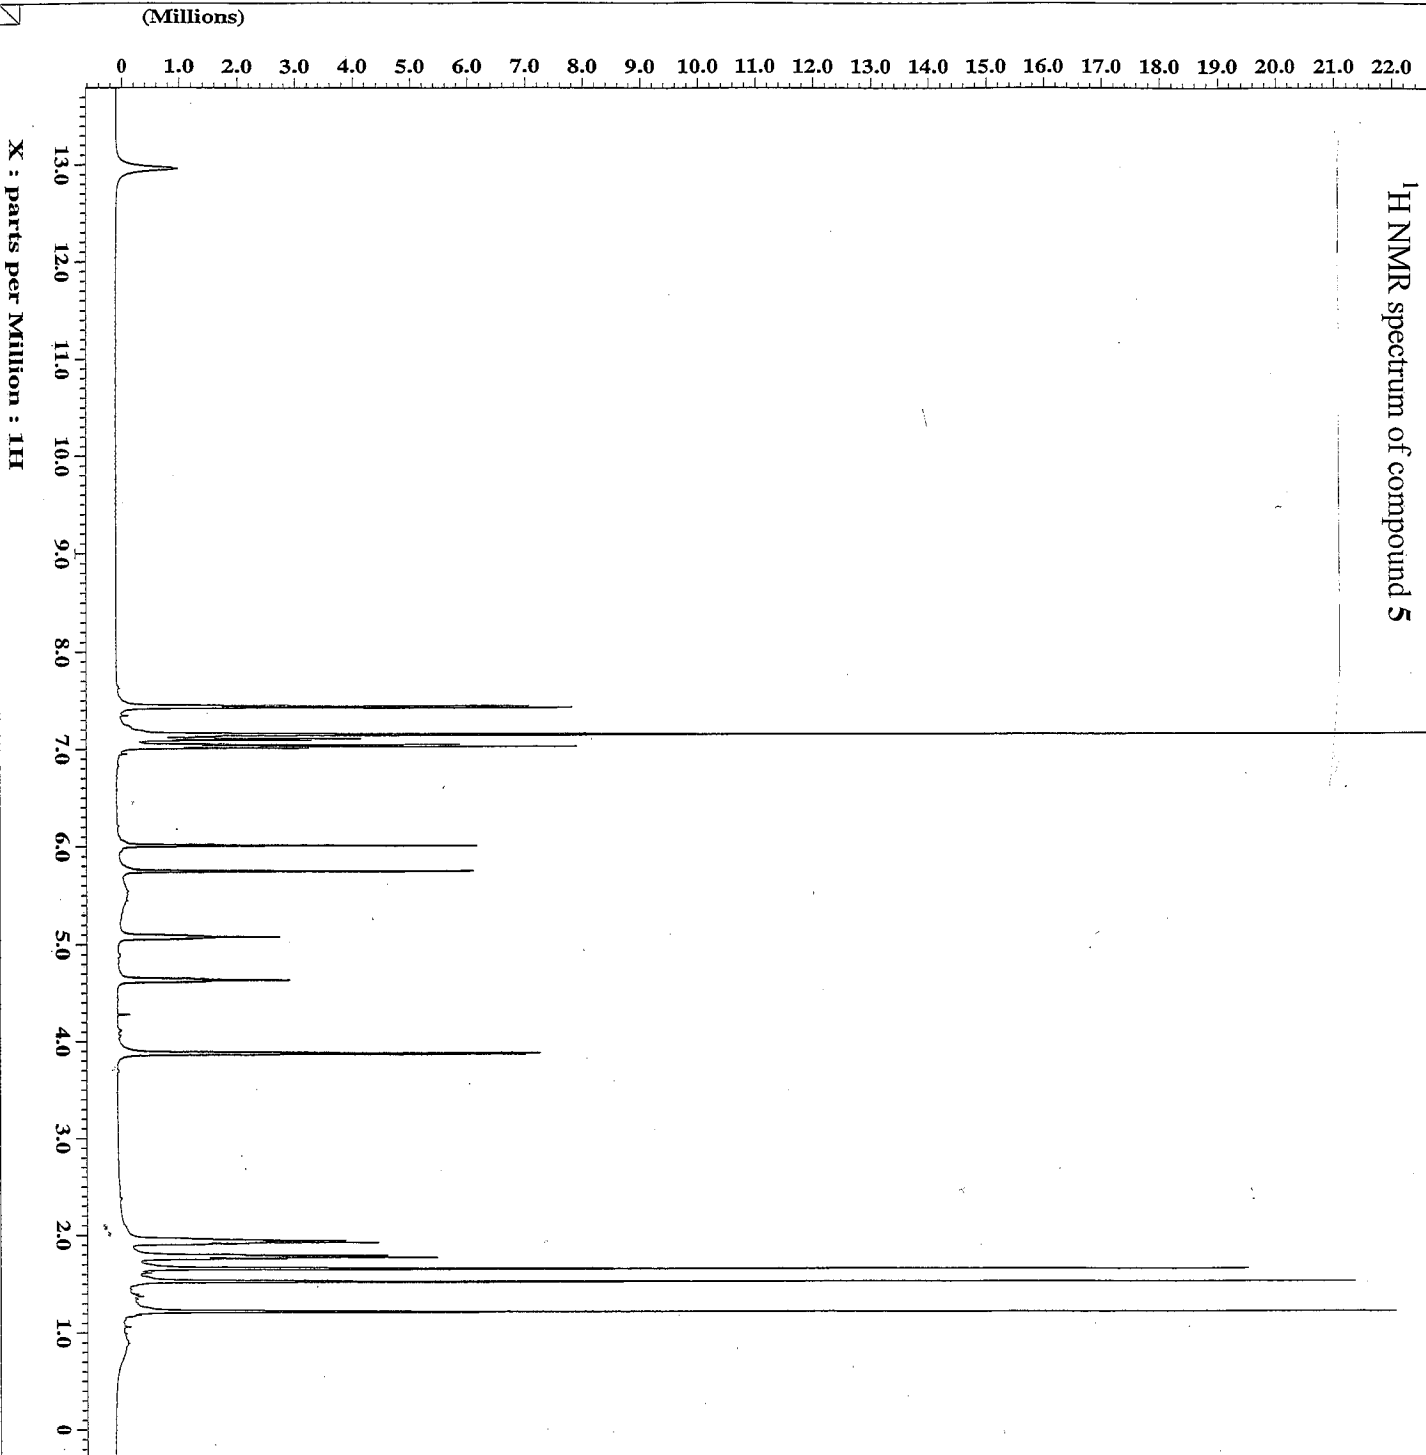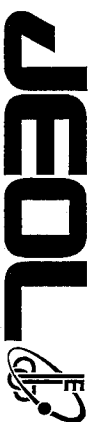

```

----- ACQUISITION PARAMETERS -----
Derived from: GHND10cben.1
File Name      = GHND10cben.1
Author        = henry
Sample ID     = S#503414
Content       = Single Pulse Experiment
Creation Date = 10-AUG-2005 14:06:32
Revision Date = 10-AUG-2005 14:02:17
Spec Site    = Eclipse+ 400

Spec Type      = DELTA_NMR
Data Format    = ID COMPLEX
Dimensions    = X
Dim File      = IH
Dim Size      = 16384
Dim Units     = [ppm]
Field_strength = 9.389766[T] (400[MHz])
X_acq_duration = 1.8612224[ls]
X_domain      = IH
X_freq        = 399.78219838[MHz]
X_offset      = 9[ppm]
X_points      = 16384
X_prescans    = 0
X_resolution  = 0.53728131[MHz]
X_sweep       = 8.80281691[MHz]
Mod_return    = 1
Scans         = 8
F0ref1_scans = 8

X_90_width    = 10.9[us]
X_acq_time    = 1.8612224[ls]
X_angle       = 45[deg]
X_pulse       = 5.45[us]
Initial_wait  = 1[ls]
Phase_preset  = 3[us]
Relaxation_delay = 4[ls]
Umblank_time  = 2[us]
    
```

<sup>13</sup>C NMR spectrum of compound 5

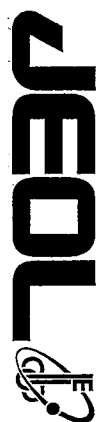

----- ACQUISITION PARAMETERS -----

Derived from: GHND10cbencar.1  
 File Name = GHND10cbencar.2  
 Author = henry  
 Sample ID = SH504547  
 Content = Single Pulse w/wh Bro  
 Creation Date = 10-AUG-2005 14:49:56  
 Revision Date = 10-AUG-2005 14:44:25  
 Spec Site = Eclipse+ 400

Spec Type = DELTA\_NMR  
 Data Format = ID COMPLEX  
 Dimensions = X  
 Dim Title = 13C  
 Dim Size = 32768  
 Dim Units = fppm]  
 Field\_strength = 9.389766[GT] (400 [MHz])  
 X\_acq\_duration = 1.3008896[ls]  
 X\_domain = 13C  
 X\_freq = 100.52530333 [MHz]  
 X\_offset = 100 [ppm]  
 X\_points = 32768  
 X\_prescans = 4  
 X\_resolution = 0.76870474 [Hz]  
 X\_sweep = 25.18891688 [kHz]  
 Iir\_domain = 1H  
 Iir\_freq = 399.78219838 [MHz]  
 Iir\_offset = 5 [ppm]  
 Mod\_return = 1  
 Scans = 1000  
 Total\_scans = 1000  
 X\_g0\_width = 11.1 [us]  
 X\_acq\_time = 1.3008896[ls]  
 X\_angle = 30[deg]  
 X\_pulse = 3.7 [us]  
 Initial\_wait = 1[ls]  
 Phase\_preset = 3[us]  
 Relaxation\_delay = 1[ls]  
 Unblank\_time = 2[us]

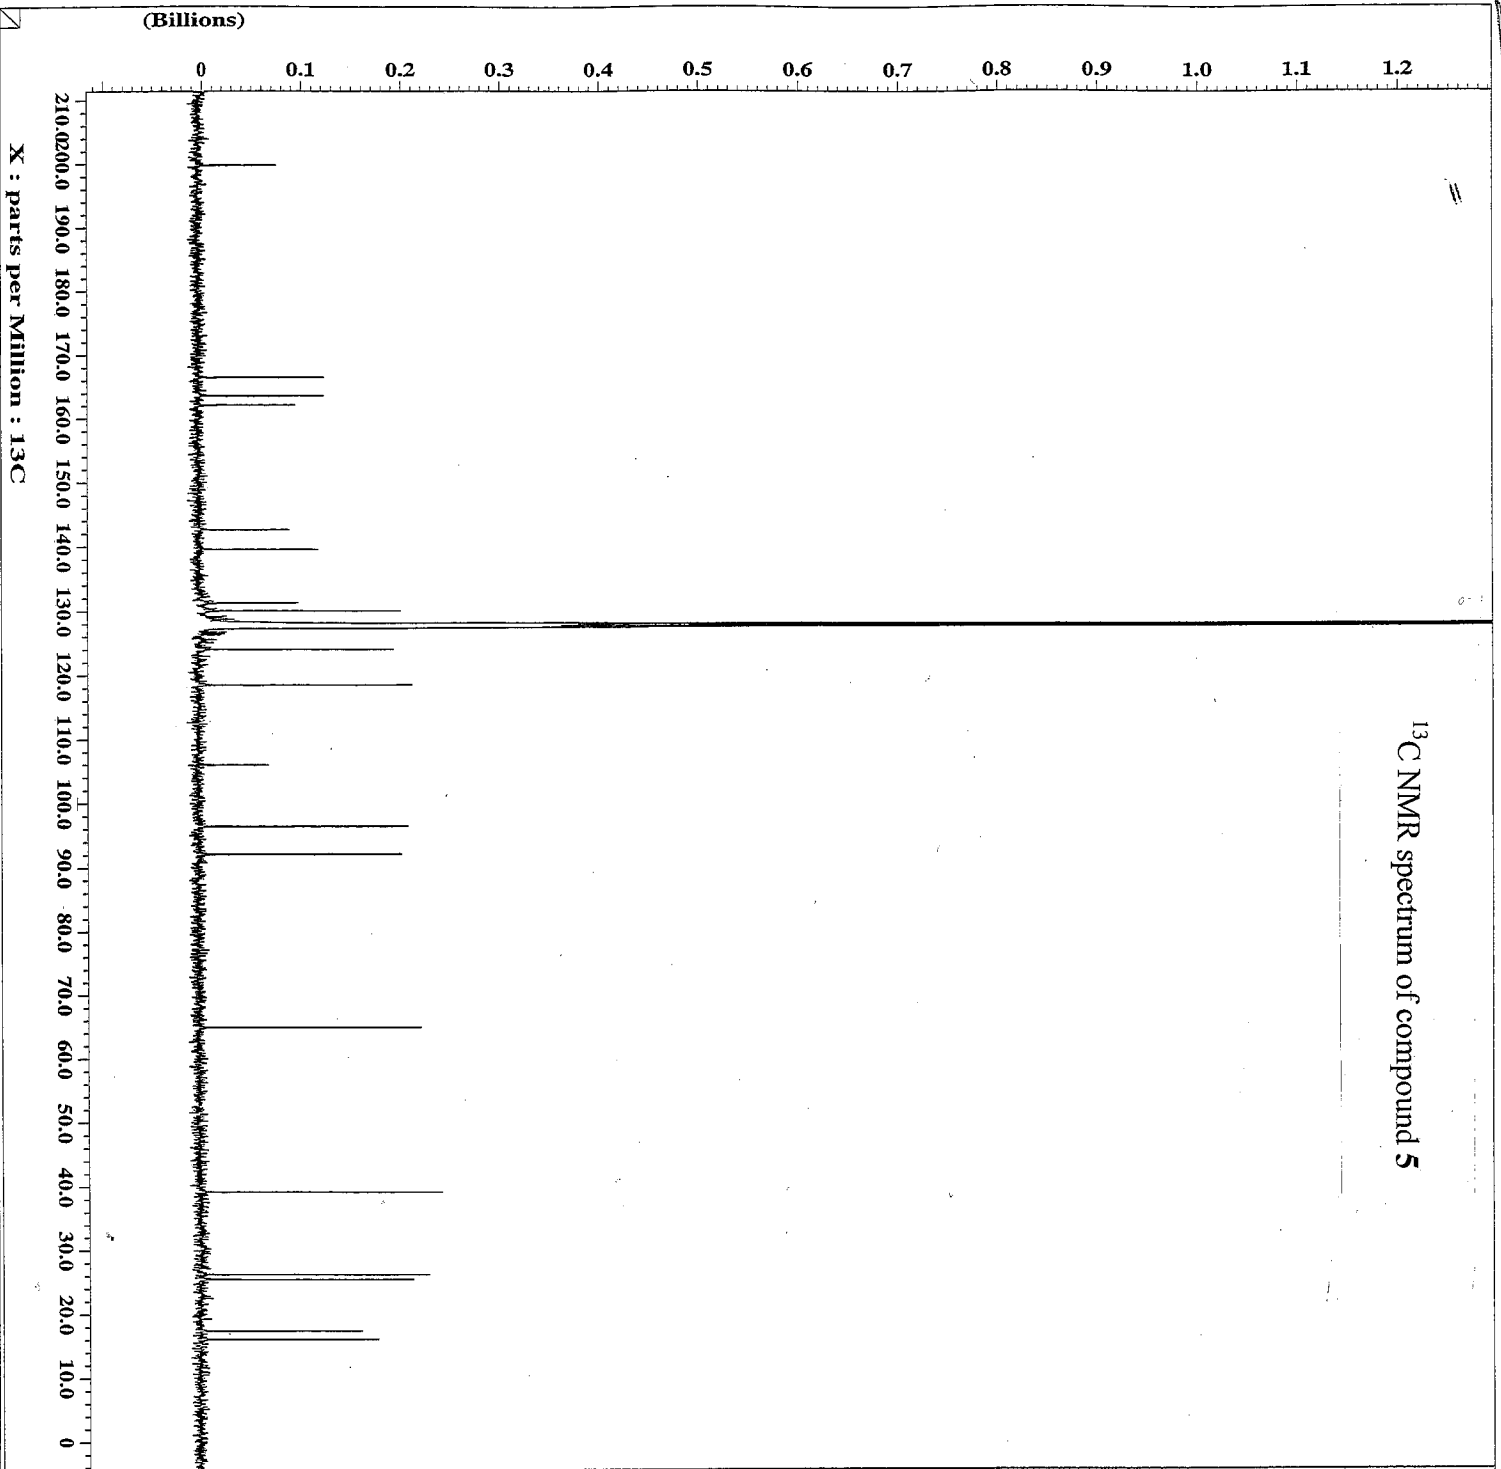

<sup>1</sup>H NMR spectrum of compound 6

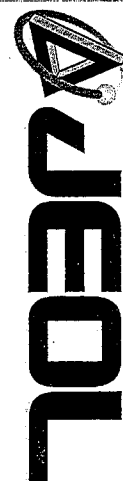

Filename = MLH38a\_pro-2.fid  
 Author = HenryResearch  
 Experiment = single\_pulse.exp  
 Sample\_id = Acetone-d6  
 Solvent = ACETONE-D6  
 Creation\_time = 16-JAN-2000 14:11:51  
 Revision\_time = 3-AUG-2010 11:51:23  
 Current\_time = 3-AUG-2010 11:52:18

Comment = Single Pulse Experiment  
 Data\_format = 1D COMPLEX  
 Dim\_size = 16384  
 Dim\_title = 1H  
 Dim\_units = [ppm]  
 Dimensions = X  
 Site = ECLIPSE+ 400  
 Spectrometer = DELTA\_NMR

Field\_strength = 9.389766 [T] (400 [MHz])  
 X\_acq\_duration = 2.7312128 [s]  
 X\_domain = 1H  
 X\_freq = 399.78219838 [MHz]  
 X\_offset = 5 [ppm]  
 X\_points = 16384  
 X\_prescans = 0  
 X\_resolution = 0.36613771 [Hz]  
 X\_sweep = 5.99880024 [kHz]  
 Clipped = FALSE  
 Mod\_return = 1  
 Scans = 18  
 Total\_scans = 18  
 X\_90\_width = 11.2 [us]  
 X\_acq\_time = 2.7312128 [s]  
 X\_angle = 45 [deg]  
 X\_pulse = 5.6 [us]  
 Initial\_wait = 1 [s]  
 Phase\_preset = 3 [us]  
 Recvr\_gain = 16  
 Relaxation\_delay = 4 [s]  
 Temp\_get = 21.9 [dC]  
 Unblank\_time = 2 [us]

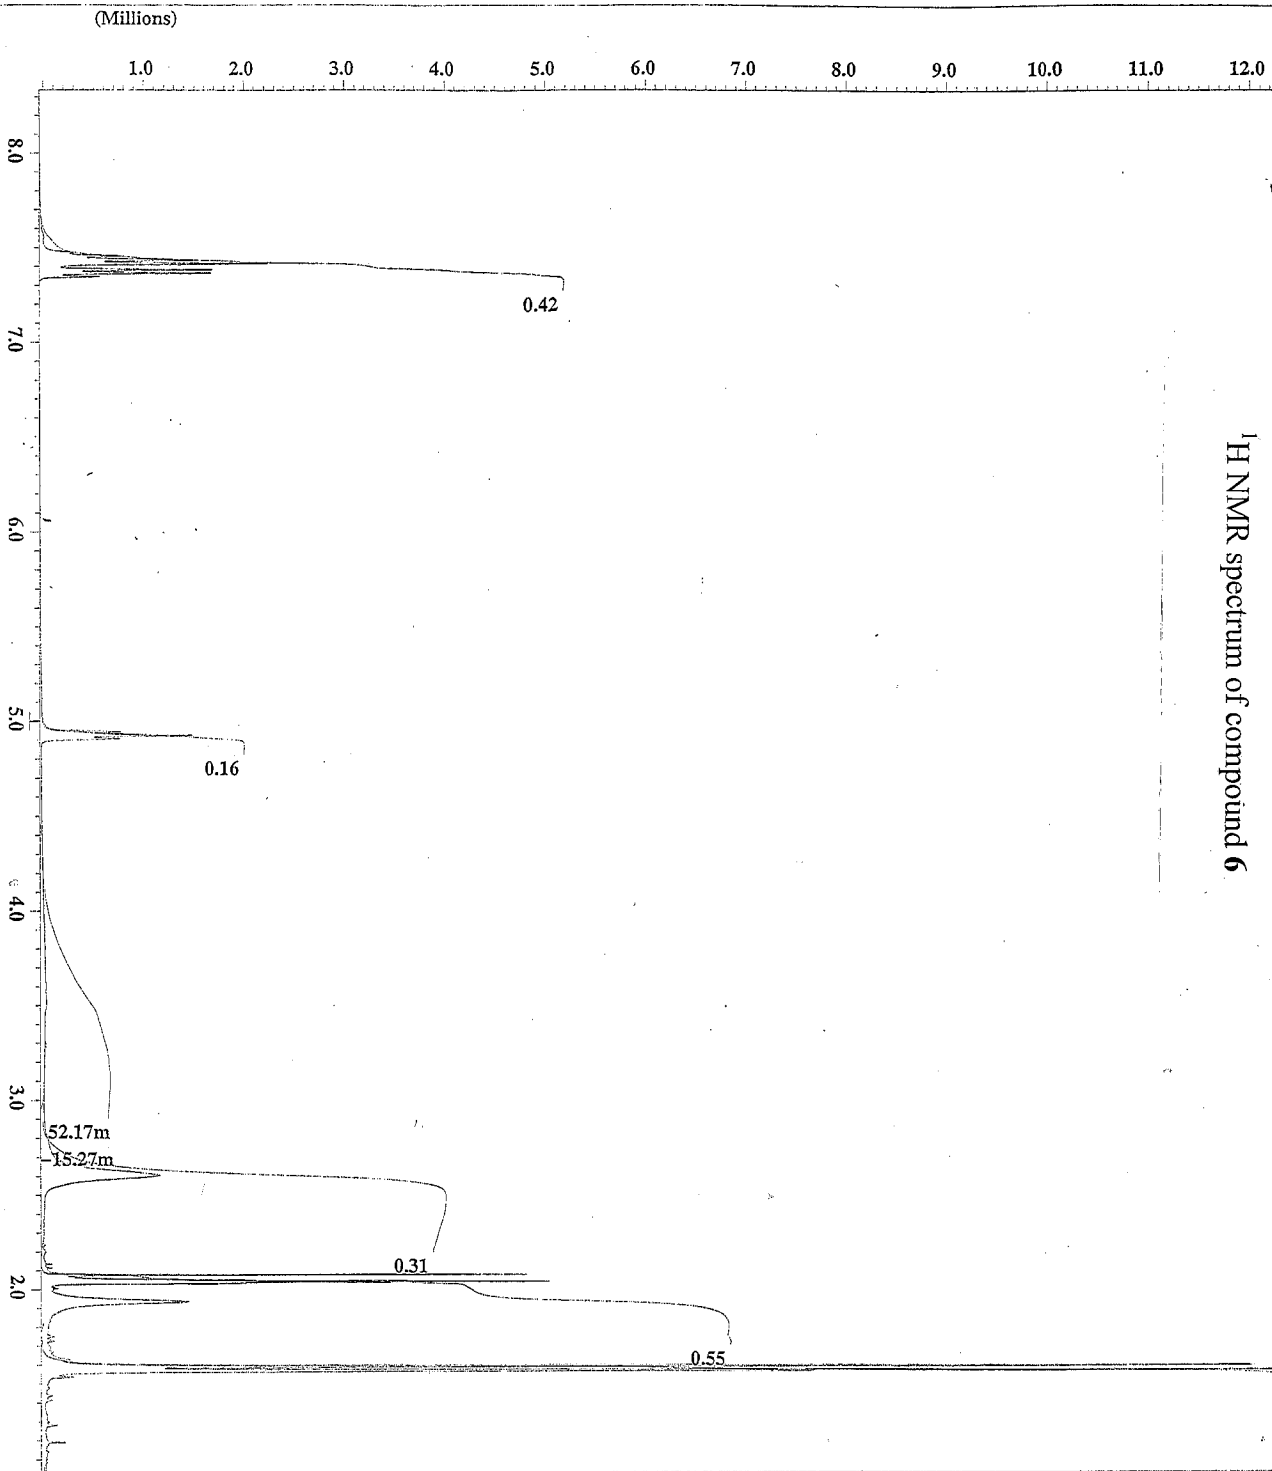

X : parts per Million : 1H

<sup>13</sup>C NMR spectrum of compound 6

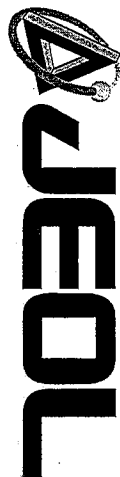

```

=====
File: 20100110_01_001
Date: 2010-01-10 10:32:53
Sample: 6
Solvent: CDCl3
Acquisition: 100 MHz
=====

```

```

=====
Filename = EPHC23G_carbon2-2_1df
Author = HenryResearch
Experiment = Single pulse dec
Sample_id = EPHC23G with pooled F
Solvent = ACETONE-d6
Creation_time = 5-JAN-2000 18:17:09
Revision_time = 4-FEB-2010 10:32:37
Current_time = 4-FEB-2010 10:32:53
=====

```

```

=====
Comment = Single pulse with Bro
Data_format = 1D COMPLEX
Dim_size = 32768
Dim_title = 13C
Dim_units = [ppm]
Dimensions = X
Site = Eclipse+ 400
Spectrometer = DELTA_NMR
=====

```

```

=====
Field_strength = 9.389766[TP] (400[MHz])
X_acq_duration = 1.3008896[ls]
X_domain = 13C
X_freq = 100.52530333[MHz]
X_offset = 100[ppm]
X_points = 32768
X_prescans = 4
X_resolution = 0.76870474[Hz]
X_sweep = 25.18891688[kHz]
Irr_domain = 1H
Irr_freq = 399.78219838[MHz]
Irr_offset = 51[ppm]
Clipped = FALSE
Mod_return = 1
Scans = 4772
Total_scans = 4772
X_90_width = 11.6[us]
X_acq_time = 1.3008896[ls]
X_angle = 30[deg]
X_pulse = 3.86666667[us]
Initial_wait = 1[ls]
Phase_preset = 3[us]
Recvr_gain = 28
Relaxation_delay = 1[ls]
Temp_get = 23.4[degC]
Undlank_time = 2[us]
=====

```

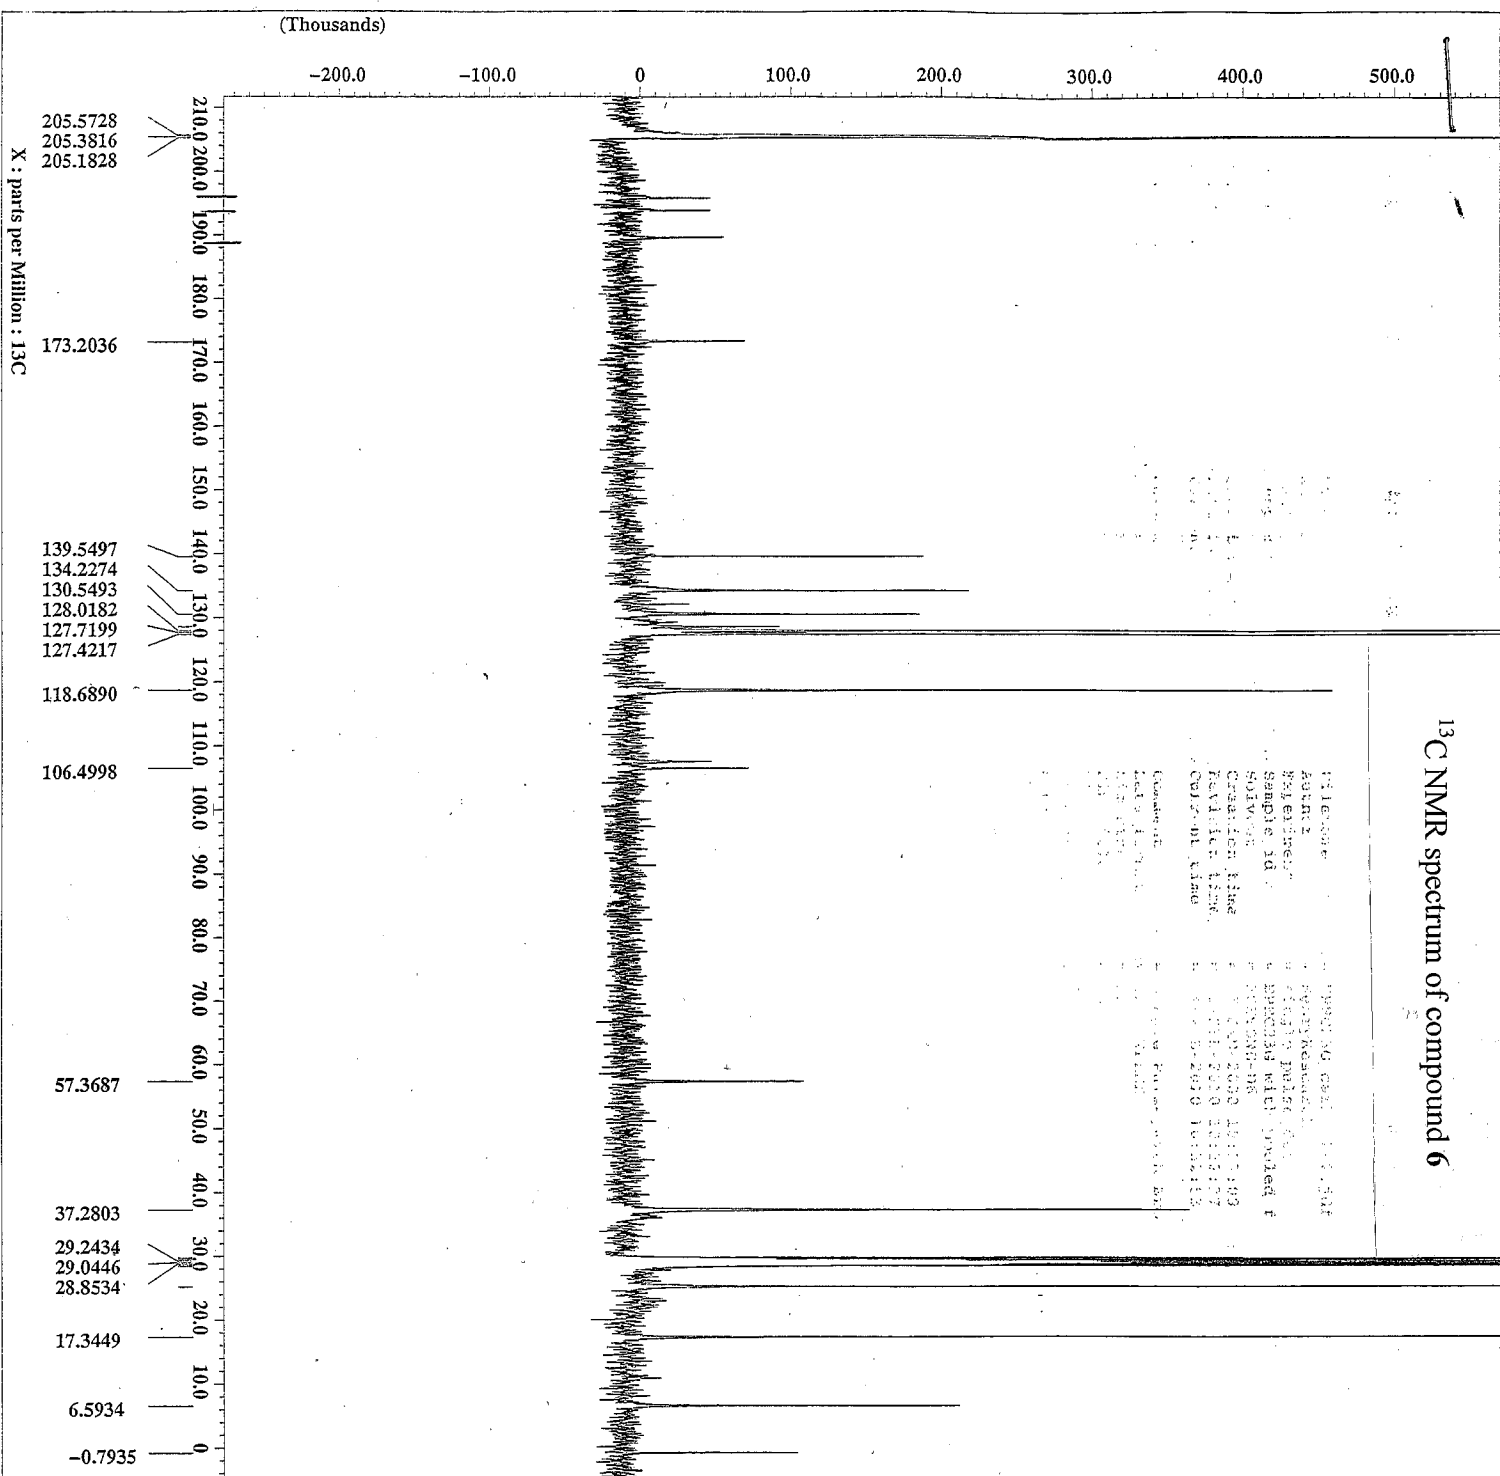

<sup>1</sup>H NMR spectrum of compound 7

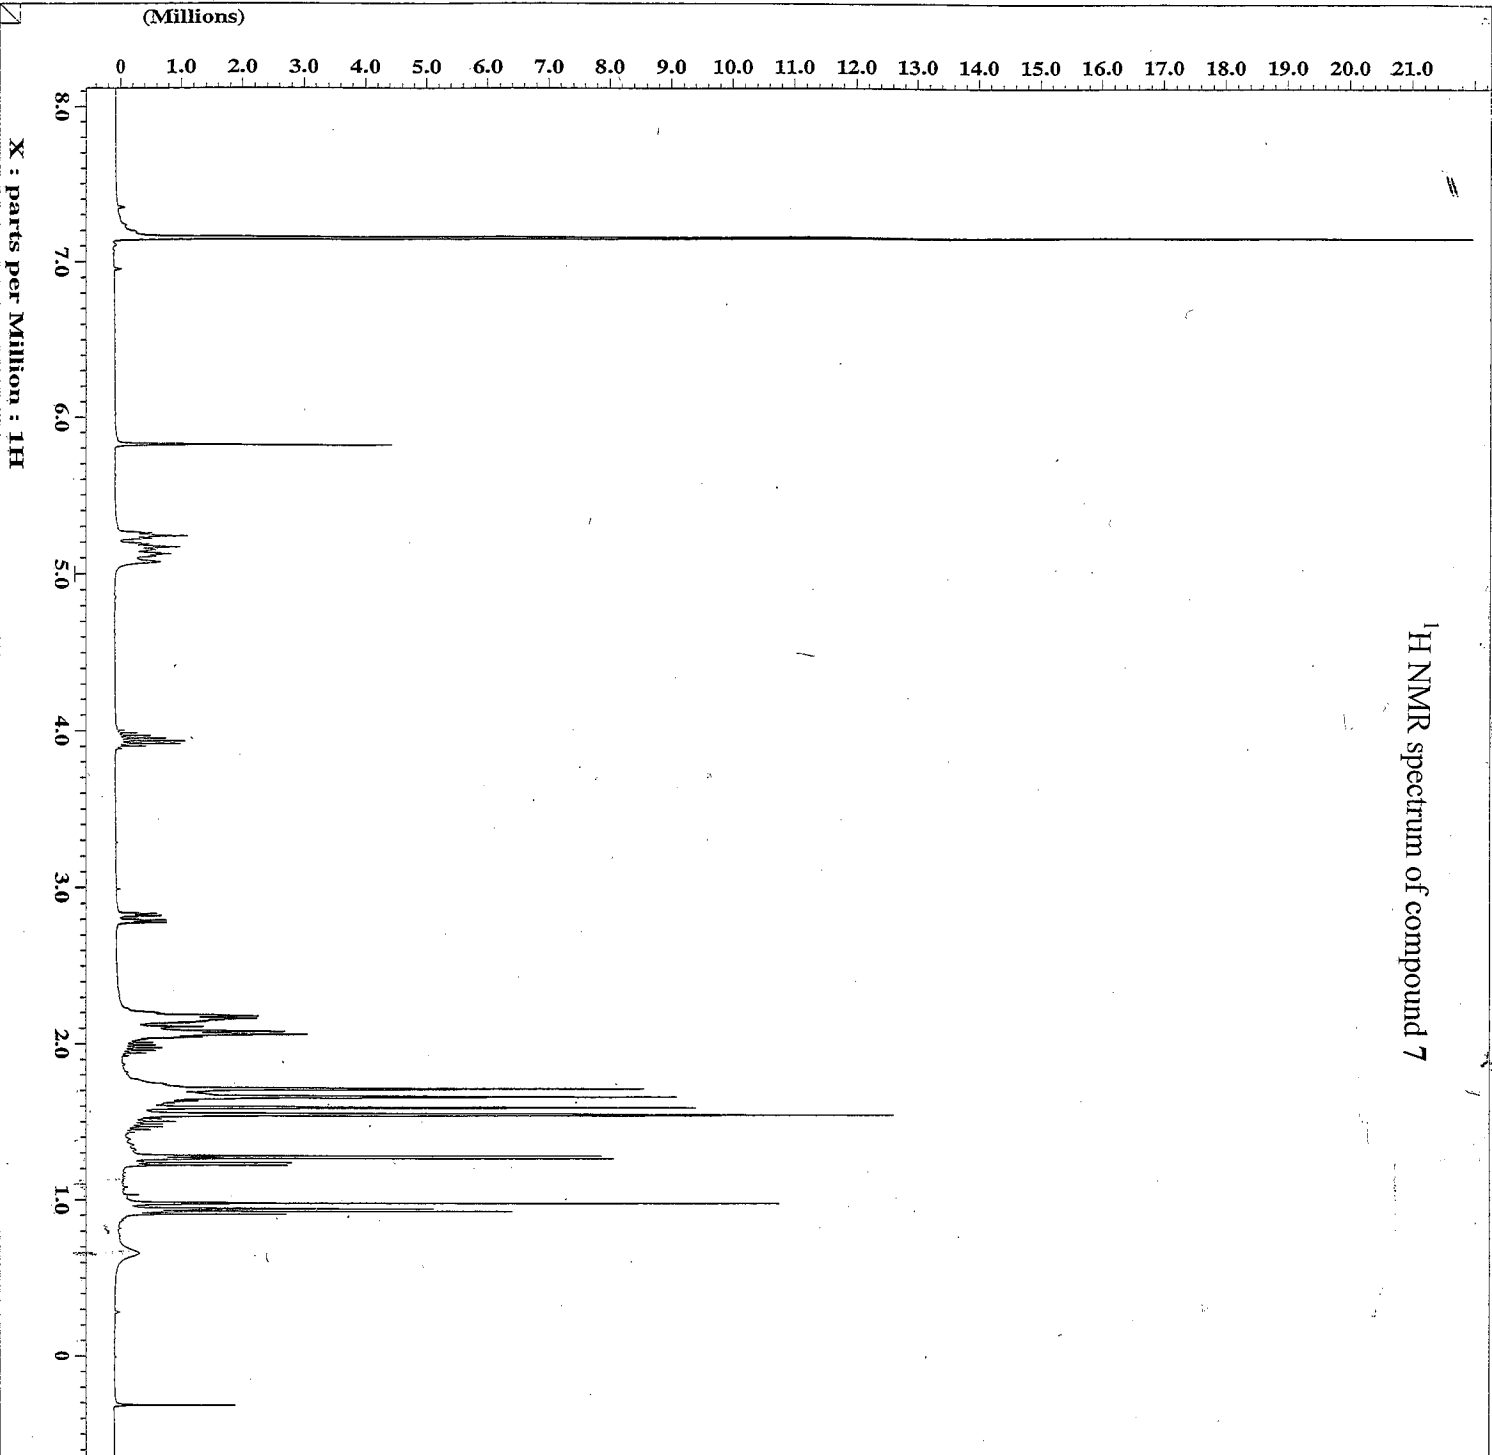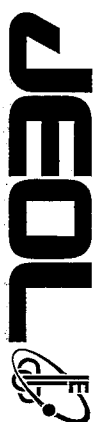

```

----- ACQUISITION PARAMETERS -----
Derived from: SR39bC6D6-protom.1
File Name      = SR39bC6D6-protom.2
Author        = Henry
Sample ID     = SR39b
Content       = Single Pulse Experiment
Creation Date = 29-JUL-2005 14:12:33

Revision Date = 29-JUL-2005 14:04:49
Spec Site     = Eolipser 400

Spec Type    = DELTA NMR
Data Format   = ID COMPLEX
Dimensions   = X
Dim F1 title = 1H
Dim Size     = 16384
Dim Units    = [ppm]
Field_strength = 9.389766 [T] (400 [MHz])
X_acq_duration = 2.7312128 [s]
X_domain      = 1H
X_freq        = 399.78219838 [MHz]
X_offset      = 5 [ppm]
X_points      = 16384
X_prescans    = 0
X_resolution  = 0.36613771 [Hz]
X_sweep       = 5.99880024 [kHz]
Mod_return    = 1
Scans         = 8
Total_scans   = 8

X_90_width    = 10.9 [us]
X_acq_time     = 2.7312128 [s]
X_angle        = 45 [deg]
X_pulse        = 5.45 [us]
Initial_wait   = 1 [s]
Phase_preset   = 3 [us]
Relaxation_delay = 4 [s]
Undlank_time   = 2 [us]
    
```

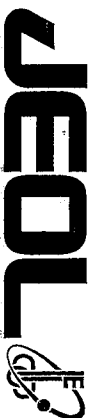

<sup>13</sup>C NMR spectrum of compound 7

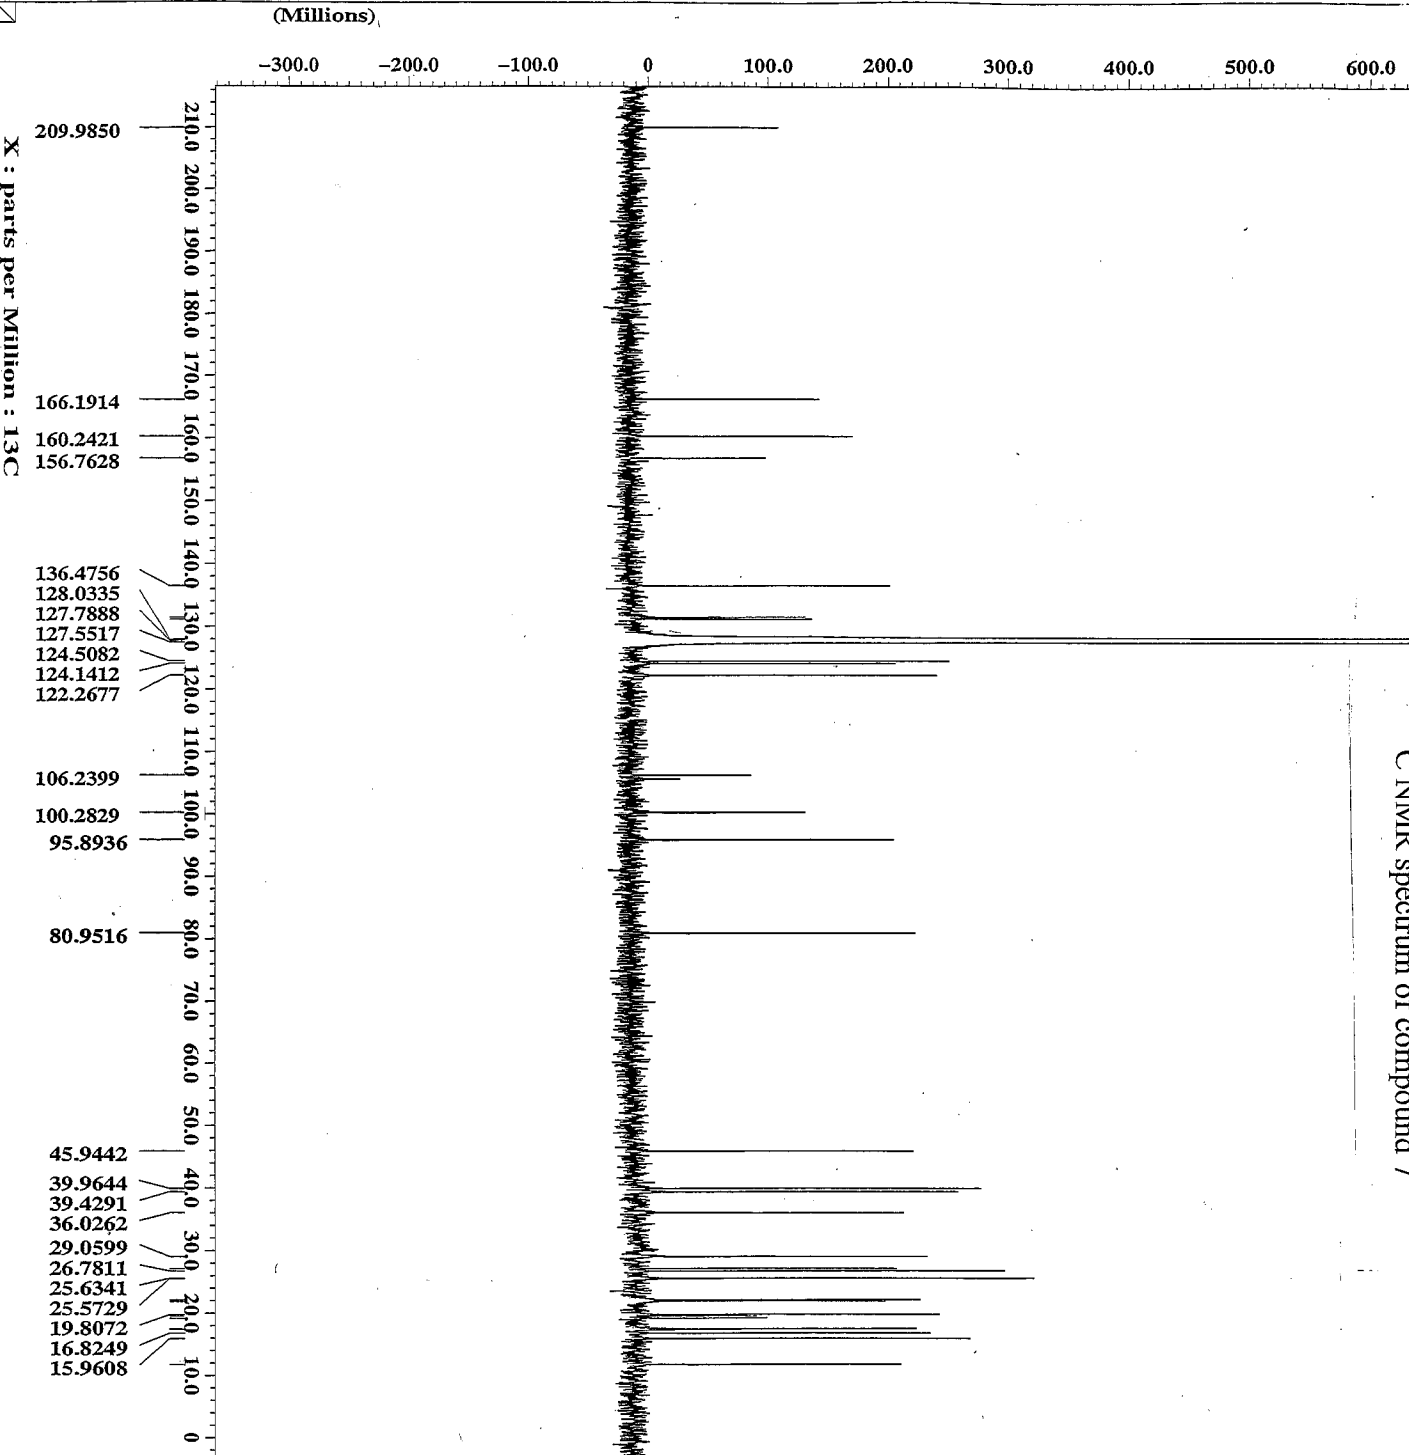

----- ACQUISITION PARAMETERS -----  
Derived from: SR39bC6D6-carbon.1  
File Name = SR39bC6D6-carbon.2  
Author = henry  
Sample ID = SR39b  
Content = Single Pulse with Bro  
Creation Date = 29-JUL-2005 16:08:29  
Revision Date = 29-JUL-2005 16:00:46  
Spec Site = Ecclipse+ 400  
Spec Type = DELTA NMR  
Data Format = ID COMPLEX  
Dimensions = X  
Dim Title = <sup>13</sup>C  
Dim Size = 32768  
Dim Units = [ppm]  
Field\_strength = 9.389766 [T] (400 [MHz])  
X\_acq\_duration = 1.3008896 [s]  
X\_domain = <sup>13</sup>C  
X\_freq = 100.52530333 [MHz]  
X\_offset = 100 [ppm]  
X\_points = 32768  
X\_prescans = 4  
X\_resolution = 0.76870474 [Hz]  
X\_sweep = 25.18891688 [kHz]  
Irr\_domain = 1H  
Irr\_freq = 399.78219838 [MHz]  
Irr\_offset = 5 [ppm]  
Mod\_return = 1  
Scans = 3000  
Total\_scans = 3000  
X\_90\_width = 11.1 [us]  
X\_acq\_time = 1.3008896 [s]  
X\_angle = 30 [deg]  
X\_pulse = 3.7 [us]  
Initial\_wait = 1 [s]  
Phase\_preset = 3 [us]  
Relaxation\_delay = 1 [s]  
Unblank\_time = 2 [us]
